# 1 **CRISPR-Cas12a genome editing at the whole-plant level using two** 2 **compatible RNA virus vectors**

3

4 **Mireia Uranga, Marta Vazquez-Vilar, Diego Orzáez, and José-Antonio Daròs\***

5

6 *Instituto de Biología Molecular y Celular de Plantas (Consejo Superior de Investigaciones*  
7 *Científicas-Universitat Politècnica de València), Valencia, Spain*

8

9 \*Address correspondence to: *José-Antonio Daròs, IBMCP (CSIC-Universitat Politècnica de*  
10 *València), Avenida de los Naranjos s/n, 46022 Valencia, Spain.*

11

## 12 **Abstract**

13

14 The use of viral vectors that can replicate and move systemically through the host plant to  
15 deliver bacterial clustered, regularly interspaced, short palindromic repeats (CRISPR)  
16 components enables genome editing at the whole-plant level and avoids the requirement for  
17 labor-intensive stable transformation. However, this approach usually relies on previously  
18 transformed plants that stably express a CRISPR-associated (Cas) nuclease. Here we describe  
19 successful DNA-free genome editing of *Nicotiana benthamiana* using two compatible RNA  
20 virus vectors, derived from tobacco etch virus (TEV; genus *Potyvirus*) and potato virus X  
21 (PVX; genus *Potexvirus*), which replicate in the same cells. The TEV and PVX vectors  
22 respectively express a Cas12a nuclease and the corresponding guide RNA. This novel two-  
23 virus vector system improves the toolbox for transformation-free virus-induced genome editing  
24 in plants and will advance efforts to breed more nutritious, resistant, and productive crops.

25

## 26 **Introduction**

27

28 Systems derived from bacterial clustered, regularly interspaced, short palindromic repeats  
29 (CRISPR) and CRISPR-associated (Cas) proteins (Cong *et al.*, 2013) have revolutionized  
30 biotechnology. In plants, CRISPR-Cas holds great promise for unprecedented genome  
31 engineering of both model species and crops (Nekrasov *et al.*, 2013; Zhang *et al.*, 2016; Li *et*  
32 *al.*, 2017; Zhu *et al.*, 2020; Huang and Puchta, 2021). Most common CRISPR/Cas arrangements  
33 include a Cas endonuclease, such as *Streptococcus pyogenes* SpCas9, and a single-guide RNA

34 (sgRNA), which specifically directs the nuclease to a sequence of interest in the genome. As in  
35 other taxonomic groups (Platt et al., 2014; Senís et al., 2014; Lau and Suh, 2017; Xu et al.,  
36 2019), virus-derived vectors have been reported as a powerful alternative to express the  
37 CRISPR/Cas components at the whole-plant level avoiding the labor-intensive and time-  
38 consuming tissue culture approaches required for stable transformation. These strategies are  
39 commonly termed as virus-induced genome editing (VIGE) and have focused on the delivery  
40 of one or more sgRNAs using RNA or DNA virus vectors in transgenic plants that stably  
41 express the Cas nuclease (Ali *et al.*, 2015; Yin *et al.*, 2015; Cody *et al.*, 2017; Ali *et al.*, 2018;  
42 Hu *et al.*, 2019; Jiang *et al.*, 2019; Ellison *et al.*, 2020; Lei *et al.*, 2021).

43 Expression of a Cas nuclease using a plant virus-derived vector able to move  
44 systemically through a plant was long considered unachievable due to cargo constraints.  
45 However, the innovative work by Ma et al. (2020) demonstrated efficient genome editing by  
46 delivering both the sgRNA and SpCas9 at the whole-plant level using a vector derived from  
47 sonchus yellow net virus (SYNV; family *Rhabdoviridae*). Despite this unprecedented  
48 achievement, additional virus-based systems for the co-expression of Cas nucleases and  
49 sgRNAs at the whole-plant level are still required to improve the current toolbox for crop  
50 engineering. Notably, each viral vector has its own unique properties, particularly a specific  
51 host range.

52 To expand the virus-based tools for tissue culture-free genome editing in plants, we co-  
53 expressed the Cas nuclease and the guide RNA using two compatible viral vectors that replicate  
54 in the same cells and coordinately move systemically through the whole-plant. We chose a  
55 potyvirus vector to express the Cas nuclease. Potyviruses (genus *Potyvirus*) are the largest  
56 group of plus-strand RNA viruses, with more than 200 currently known species that collectively  
57 can infect a large range of host plants (Wylie *et al.*, 2017). We also focused on a Cas12a  
58 (formerly Cpf1) nuclease, which is a component of a class 2 type V CRISPR system, isolated  
59 from *Lachnospiraceae bacterium* ND2006 (LbCas12a) (Zetsche et al., 2015). Genome editing  
60 using LbCas12a has been demonstrated in plants (Endo et al., 2016; Tang et al., 2017; Wang et  
61 al., 2017; Xu et al., 2017), and the complementary DNA (cDNA) corresponding to this nuclease  
62 is smaller than that of SpCas9. We also co-expressed the guide RNA using a recently described  
63 potato virus X (PVX, genus *Potexvirus*, family *Virgaviridae*) vector, which efficiently induces  
64 heritable gene editing in *Nicotiana benthamiana* plants that stably express SpCas9 (Uranga  
65 *et al.*, 2021). Our results demonstrated efficient DNA-free *N. benthamiana* genome editing  
66 using the two compatible RNA virus vectors.

67

## 68 **Methods**

69

### 70 **Viral vectors**

71 Guide RNAs to target *N. benthamiana* Flowering locus *T* (*NbFT*; SolGenomics  
72 Niben101Scf01519g10008.1) and *Xylosyl transferase 1* (*NbXT1*; Niben101Scf04205g03008.1)  
73 were selected using the CRISPR-P online tool as described by Bernabé-Orts et al. (2019) ([Table](#)  
74 [S1](#)). Nucleotide (nt) sequences of recombinant viral clones are shown in [Figs. S1](#) and [S2](#). These  
75 clones were built using the primers shown in [Tables S2](#) and [S3](#).

76

### 77 **Plant inoculation**

78 *N. benthamiana* wild-type and transformed plants expressing tobacco etch virus (TEV, genus  
79 *Potyvirus*) nuclear inclusion *b* (NIb) protein (Martí *et al.*, 2020), were grown at 25°C under a  
80 12 h/12 h day/night photoperiod. Plants that were 4- to 6-weeks-old were agroinoculated as  
81 previously described (Bedoya *et al.*, 2010; Uranga *et al.*, 2021). Tissue samples (approximately  
82 100 mg) from the first symptomatic upper non-inoculated leaf were collected at different days  
83 post inoculation (dpi), as indicated, for virus progeny and plant genome-editing analyses.

84

### 85 **Reverse transcription (RT)-polymerase chain reaction (PCR) analysis of viral progeny**

86 RNA was purified from leaf samples using silica gel columns (Uranga *et al.*, 2021). cDNA was  
87 synthesized using RevertAid reverse transcriptase (Thermo Scientific) and primer D179 ([Table](#)  
88 [S4](#)). PCR with *Thermus thermophilus* DNA polymerase (Biotools) was used to amplify the  
89 TEV coat protein (CP) cistron (primers D178 and D211; [Table S4](#)) or a fragment of the  
90 LbCas12a open reading frame (ORF) (primers D3604 and D3605; [Table S4](#)). PCR products  
91 were separated by electrophoresis in 1% agarose gels followed by staining with ethidium  
92 bromide.

93

### 94 **Analysis of *N. benthamiana* genome editing**

95 DNA from leaf samples was purified using silica gel columns (Uranga *et al.*, 2021). *N.*  
96 *benthamiana* genome fragments were amplified by PCR using high-fidelity Phusion DNA  
97 polymerase (Thermo Scientific) ([Table S5](#)). PCR products were separated by agarose gel  
98 electrophoresis, purified from the gel, and subjected to Sanger sequencing ([Table S5](#)). The  
99 presence of sequence modifications was analyzed using the inference of CRISPR edits (ICE)  
100 software (<http://www.synthego.com/products/bioinformatics/crispr-analysis>).

101

## 102 Results

103

### 104 A dual virus-based vector system to co-express Cas nucleases and guide RNAs in plants

105

106 Initially, we built a TEV recombinant clone in which the cDNA of a human codon-optimized  
107 LbCas12a replaced that of the viral Nib protein (TEV $\Delta$ N::LbCas12a). Our previous work  
108 showed that this vector could express large exogenous sequences, such as a whole bacterial  
109 metabolic pathway to biosynthesize lycopene or the saffron carotenoid cleavage dioxygenase  
110 (Majer *et al.*, 2017; Martí *et al.*, 2020). However, since the virus lacks the viral RNA-dependent  
111 RNA polymerase Nib, it replicates only in plants that express this protein (Majer *et al.*, 2017).  
112 In our recombinant clone, the sequence coding for LbCas12a replaced most of the Nib cistron  
113 and was flanked by the native nuclear inclusion *a* protease (NIaPro) cleavage sites that mediate  
114 the release of the nuclease from the viral polyprotein (Fig. 1A and Fig. S1).

115 Next, we built a recombinant version of PVX in which the LbCas12a CRISPR RNA  
116 (crRNA) was expressed under the control of the viral CP promoter, and the 29 initial codons of  
117 PVX CP were deleted to improve the stability of the recombinant clone (Dickmeis *et al.*, 2014).  
118 The viral CP was expressed from a heterologous promoter derived from that of the CP of  
119 bamboo mosaic virus (BaMV; genus *Potexvirus*). Based on previous work by Bernabé-Orts *et al.*  
120 (2019) assessing the efficiency of the Cas12a-mediated gene editing of several *N.*  
121 *benthamiana* loci, *NbFT* was selected as the target gene (PVX::crFT) (Fig. 1B and Fig. S2).  
122 The 65-nt crRNA was cloned downstream of the PVX CP promoter and consisted of a 23-nt  
123 protospacer sequence specific to the target gene flanked on both 5' and 3' ends by a conserved  
124 21-nt scaffold, also known as a direct repeat.

125 *N. benthamiana* plants constitutively expressing TEV Nib under the control of  
126 cauliflower mosaic virus (CaMV) 35S promoter and terminator (Martí *et al.*, 2020) were co-  
127 inoculated with a 1:1 mix of two cultures of *Agrobacterium tumefaciens* transformed with  
128 plasmids harboring TEV $\Delta$ Nib::LbCas12a and PVX::crFT constructs. Controls included  
129 inoculation of TEV $\Delta$ Nib::LbCas12a alone and inoculation of TEV $\Delta$ Nib::crtB, which allows  
130 visual tracking of virus systemic movement due to the yellow pigmentation of infected tissue  
131 induced by *Pantoea ananatis* phytoene synthase (crtB) (Majer *et al.*, 2017). At 7 dpi, typical  
132 symptoms of TEV infection emerged in the upper non-inoculated leaves of all plants. Notably,  
133 at 14 dpi irregular chlorotic spots appeared in the leaves of plants co-inoculated with  
134 TEV $\Delta$ Nib::LbCas12a and PVX::crFT, but not in those inoculated with TEV $\Delta$ Nib::LbCas12a  
135 alone (Fig. S3). PVX infection is characterized by the appearance of vein banding, ring spots

136 and leaf atrophy (Loebenstein and Gaba, 2012). Therefore, the observed phenotypic alteration  
137 could have been due to LbCas12a-mediated editing of *NbFT* or an effect of the coinfection.  
138 Samples from the first systemically infected upper leaf were collected at 7 and 14 dpi, and  
139 TEV $\Delta$ NiB progeny were studied by RT-PCR analysis (Fig. 1C). An 804-bp specific region of  
140 the TEV genome corresponding to the CP cistron was amplified in all virus-inoculated plants,  
141 confirming the presence of the virus (Fig. 1C, top panel). However, for viral vectors carrying  
142 big cargos, genomes larger than wild type are likely to recombine to smaller sizes, thus  
143 triggering the loss of heterologous genes (Gilbertson et al., 2003). An additional RT-PCR  
144 analysis was performed, and a 600-bp cDNA corresponding to a fragment of the LbCas12a  
145 ORF was exclusively amplified from plants inoculated with TEV $\Delta$ NiB::LbCas12a alone or co-  
146 inoculated with TEV $\Delta$ NiB::LbCas12a and PVX::crFT, regardless of sampling time (Fig. 1C,  
147 bottom panel). These results suggested that the LbCas12a nuclease was expressed from the  
148 onset of viral infection and throughout the rest of the experiment.

149 Next, DNA was purified from leaf samples collected at 7 and 14 dpi, and a 550-bp  
150 fragment of the *NbFT* gene covering the LbCas12a target site was amplified by PCR. Sanger  
151 sequencing of the PCR products and ICE analysis revealed robust gene editing at 14 dpi in  
152 plants co-inoculated with TEV $\Delta$ NiB::LbCas12a and PVX::crFT, reaching an indel percentage  
153 of up to 75% (Fig. 1D and Fig. S4). No significant differences were observed at 21 and 28 dpi.  
154 The indel distribution was consistent with the deletion-enriched mutagenesis profile  
155 characteristic of Cas12a activity, being mainly 5- to 10-bp deletions (Bernabé-Orts et al., 2019).  
156 These results indicate that the simultaneous delivery of CRISPR-Cas12a components through  
157 two compatible viral vectors (i.e., TEV $\Delta$ NiB and PVX) allows highly efficient, DNA-free  
158 targeted mutagenesis in *N. benthamiana*.

159

## 160 Multiplex genome editing using the dual virus-based vector system in plants

161

162 A key advantage of CRISPR-Cas genome editing is the capacity to target several loci at once  
163 by the simultaneous expression of several guide RNAs (i.e., multiplexing). Based on our  
164 observations in Cas9-expressing plants (Uranga et al., 2021), we wondered whether the PVX  
165 vector could allow the delivery of multiple, functional crRNAs for Cas12a-mediated editing.  
166 To investigate this, we selected *Xylosyl transferase 1* (*NbXT1*) as the second target gene. As  
167 Cas12a can self-process crRNAs due to its RNase III activity, *NbXT1* and *NbFT* crRNAs were  
168 arranged in tandem under the control of the same CP promoter, thus creating the  
169 PVX::crXT1:crFT construct (Fig. 1E). *N. benthamiana* plants constitutively expressing TEV

170 Nib were co-inoculated with a 1:1 mix of two *A. tumefaciens* cultures carrying  
171 TEV $\Delta$ Nib::LbCas12a and PVX::crXT1:crFT. *A. tumefaciens* transformed with TEV::crtB was  
172 used as a control in this assay. The first systemically infected leaf was sampled at 14, 21, and  
173 28 dpi, following extraction of genomic DNA and PCR amplification of the target sites. ICE  
174 analysis revealed efficient gene editing on both *NbXT1* and *NbFT*, with average indel  
175 percentages ranging from 76% to 88%, which was maintained regardless of the sampling time  
176 (Fig. 1F). In addition, the absence of statistically relevant differences in gene editing among  
177 *NbXT1* and *NbFT* suggested that LbCas12a can efficiently self-process tandemly arrayed  
178 crRNAs. Time-course comparison with the single-crRNA construct, in the case of *NbFT*, also  
179 revealed that multiplexing does not affect the editing efficiency, since the mutation rates  
180 achieved with both strategies were similar (Fig. 1D and F).

181

### 182 Dual vector CRISPR-Cas genome editing in wild-type plants

183

184 The fact that TEV $\Delta$ Nib infectivity depends on the supplementation of viral Nib from a  
185 transgene may be perceived as a limitation of this genome-editing system, as the approach is  
186 still bound to a previously transformed plant. An alternative strategy for supplying Nib activity  
187 consists of the co-inoculation of TEV $\Delta$ Nib with a recombinant PVX expressing Nib (Bedoya  
188 et al., 2010). We wondered whether a single PVX vector could: (i) provide Nib activity for the  
189 systemic movement of TEV $\Delta$ Nib; and (ii) deliver the crRNA for LbCas12a-mediated gene  
190 editing. Thus, the coding sequence of the TEV Nib cistron plus an additional amino-terminal  
191 Met was inserted within the expression cassette in PVX. *NbFT*-specific crRNA was added  
192 downstream of Nib without any linker sequence, so that both Nib and crFT expression were  
193 under the control of the PVX CP promoter (PVX::Nib:crFT) (Fig. 2A). Wild-type *N.*  
194 *benthamiana* plants were co-inoculated with a 1:1 mix of two cultures of *A. tumefaciens*  
195 carrying TEV $\Delta$ Nib::LbCas12a and PVX::Nib:crFT. *A. tumefaciens* transformed with  
196 TEV::crtB was again used as a control. At 7 dpi, the apical leaves of the co-inoculated *N.*  
197 *benthamiana* plants became symptomatic (i.e., leaf curling). At 14 dpi, necrotic spotting and  
198 interveinal mottling were observed in systemic leaves, which became more noticeable over time  
199 (Fig. S5). Samples from the first systemically infected upper leaf were collected at 14 dpi and  
200 the 550-bp fragment of the *NbFT* gene covering the LbCas12a target site was amplified by  
201 PCR. ICE analysis of the PCR products exhibited 20% indels in plants co-inoculated with  
202 TEV $\Delta$ Nib::LbCas12a and PVX::Nib:crFT. These results indicate that a single PVX vector can



203 supply the viral Nib activity that allows TEV $\Delta$ Nib to systemically spread in wild-type *N.*  
204 *benthamiana*, as well as to perform crRNA delivery for LbCas12a-mediated genome editing.

205

## 206 **Discussion**

207

208 In this study we describe the engineering of a dual RNA-virus system for the delivery of  
209 CRISPR-Cas12a components for genome editing in plants. The system consists of two  
210 compatible plus-strand RNA viruses, specifically the potyvirus TEV and the potexvirus PVX,  
211 to express the Cas nuclease and the guide RNA, respectively. Notably, the TEV vector  
212 (TEV $\Delta$ Nib) contains the deletion of the RNA-dependent RNA polymerase (Nib) in order to  
213 accommodate the large ORF of the Cas nuclease. Our previous efforts to express a functional  
214 Cas nuclease using a full-length potyvirus vector in plants have been unsuccessful. However,  
215 recent works have reported successful Cas9 expression and DNA-free genome editing using  
216 single SYMV (Ma et al., 2020) and PVX (Ariga *et al.*, 2020) vectors in *N. benthamiana*. These  
217 contrasting results emphasize the diverse properties of vectors derived from viruses belonging  
218 to different genera and families, and the necessity for a large spectrum of molecular tools,  
219 operating in a wide range of host species, to tackle challenging VIGE goals in crop plants.  
220 Notably, SYNIV is a minus-strand RNA virus the inoculation of which entails some complexity  
221 (Peng *et al.*, 2021) and, as with each plant virus, it exhibits a particular host range (Jackson and  
222 Christie, 1977).

223 In this work, we aimed to express a Cas nuclease using a potyvirus vector for DNA-free  
224 plant-genome editing. The genus *Potyvirus* is the largest among the plant RNA viruses, and  
225 comprises more than 200 species that infect a wide range of host plants from many different  
226 botanical families (Wylie *et al.*, 2017). Therefore, it offers a wealth of genetic resources for  
227 VIGE. Although we were unable to successfully express the Cas nuclease using a full-length  
228 potyvirus vector, we demonstrated that TEV $\Delta$ Nib allows the transient expression of LbCas12a,  
229 and that PVX can perform both single or multiple crRNA delivery as well as providing the Nib  
230 activity. Our two-virus delivery system resulted in efficient DNA-free targeted editing both in  
231 Nib-expressing and wild-type *N. benthamiana* plants, reaching indel percentages of up to 80%  
232 and 20%, respectively (Figs. 1 and 2). This dual vector system not only incorporates the  
233 enormous genetic resources of potyviruses for VIGE, but also demonstrates that compatible  
234 RNA virus vectors can be used to simultaneously deliver several CRISPR-Cas components.  
235 This could be useful for more sophisticated arrangements in DNA-free plant-genome editing  
236 and gene-expression regulation studies. Recently, we developed a PVX vector to efficiently

237 express multiplex SpCas9 sgRNAs at the whole-plant level. Current results with LbCas12a  
238 confirm that PVX can be easily engineered for the simultaneous delivery of guide RNAs  
239 regardless of the nature of the Cas nuclease, which highlights its usefulness in a variety of  
240 multiplexing approaches.

241 In contrast to previous reports of DNA-free VIGE that used SpCas9 (Ariga *et al.*, 2020;  
242 Ma *et al.*, 2020), we selected Cas12a. This was due to the following unique features of the  
243 nuclease (Zaidi *et al.*, 2017): (i) the cleavage of target DNA is directed by a single crRNA  
244 shorter than that of SpCas9 sgRNA; (ii) the protospacer adjacent motif (PAM) is T-rich (5'-  
245 TTTN-3'); (iii) DNA cleavage results in cohesive ends with 4- or 5-nt overhangs, which might  
246 facilitate homology-directed repair (HDR); (iv) it exhibits RNase III activity useful to facilitate  
247 multiplex gene editing; and (v) it is smaller than SpCas9 (3.8 kb vs 4.2 kb), which is important  
248 in terms of viral delivery. Moreover, the unique characteristics of the CRISPR-Cas12a system,  
249 unlike that of Cas9, such as the recognition of a T-rich PAM and the induction of staggered  
250 ends that facilitate homologous recombination, limit the range of target sequences and thus  
251 reduce off-target activity (Zaidi *et al.*, 2017). Cas12a orthologs from *Francisella novicida* U112  
252 (FnCas12a), *Acidaminococcus* sp. BV3L6 (AsCas12a) and LbCas12a were first experimentally  
253 validated in mammalian cells (Kim *et al.*, 2016, 2017a; Zetsche *et al.*, 2017). In plants, targeted  
254 mutagenesis was achieved in rice and tobacco using any of the orthologs (Endo *et al.*, 2016;  
255 Tang *et al.*, 2017; Wang *et al.*, 2017; Xu *et al.*, 2017). A DNA-free approach based on the  
256 delivery of AsCas12a or LbCas12a loaded with crRNA was also validated in wild tobacco and  
257 soy-bean protoplasts (Kim *et al.*, 2017b). Here we focused on LbCas12a, since previous works  
258 reported that this nuclease possesses higher efficiency than FnCas12a or AsCas12a (Tang *et al.*,  
259 2017; Bernabé-Orts *et al.*, 2019), and is also effective for plant-genome editing when virally  
260 delivered.

261 In conclusion, our dual RNA-virus-based system broadens the current toolbox for DNA-  
262 free VIGE and will contribute to applications in plant functional genomics and crop  
263 improvement.

264

## 265 **Funding Information**

266

267 This research was supported by grants BIO2017-83184-R and PID2019-108203RB-100 from  
268 the Ministerio de Ciencia e Innovación (Spain) through the Agencia Estatal de Investigación  
269 (co-financed by the European Regional Development Fund), and H2020-760331 Newcotiana  
270 from the European Commission. M.U. and M.V.V. are the recipients of fellowships



271 FPU17/05503 from the Ministerio de Ciencia e Innovación (Spain) and APOSTD/2020/096  
272 from the Generalitat Valenciana (Spain), respectively.

273

## 274 **Supplementary Material**

275

276 **Figure S1.** Full sequence of wild-type tobacco etch virus (TEV, Genbank accession number  
277 DQ986288), the defective viral vector TEV $\Delta$ NIb and their derived recombinant viruses,  
278 TEV::crtB, TEV $\Delta$ NIb::crtB and TEV $\Delta$ NIb::LbCas12a.

279 **Figure S2.** Full sequence of wild-type potato virus X (PVX; GenBank accession number  
280 MT799816) and its derived recombinant viruses PVX::crFT and PVX::NIb:crFT.

281 **Figure S3.** 35S::NIb *N. benthamiana* plants constitutively expressing TEV NIb and  
282 representative leaves from these plants at 14 dpi inoculated with TEV $\Delta$ NIb::LbCas12a or co-  
283 inoculated with TEV $\Delta$ NIb::LbCas12a and PVX::crFT.

284 **Figure S4.** Example of a sequence electropherogram and mutagenesis profile from 35S::NIb *N.*  
285 *benthamiana* plants co-inoculated with TEV $\Delta$ NIb::LbCas12a and PVX::crFT.

286 **Figure S5.** Representative leaves from wild-type *N. benthamiana* plants at 14 dpi inoculated  
287 with TEV $\Delta$ NIb::LbCas12a alone, PVX::NIb:crFT alone, or coinoculated with  
288 TEV $\Delta$ NIb::LbCas12a and PVX::NIb:crFT.

289 **Table S1.** *N. benthamiana* genes targeted by the CRISPR-Cas12a system. PAMs are highlighted  
290 with a grey background.

291 **Table S2.** Primers used for the construction of recombinant viruses.

292 **Table S3.** Primer combinations used for the construction of recombinant viruses.

293 **Table S4.** Primers used for TEV $\Delta$ NIb diagnosis by RT-PCR.

294 **Table S5.** Primers used for Cas12a-crRNA gene editing analysis.

295

## 296 **References**

297

298 Ali, Z., Eid, A., Ali, S., and Mahfouz, M.M. (2018) Pea early-browning virus-mediated  
299 genome editing via the CRISPR/Cas9 system in *Nicotiana benthamiana* and *Arabidopsis*.  
300 *Virus Res.*, **244**, 333–337.

301 Ariga, H., Toki, S., and Ishibashi, K. (2020) Potato virus X vector-mediated DNA-free  
302 genome editing in plants. *Plant Cell Physiol.*, **61**, 1946–1953.

303 Bedoya, L., Martínez, F., Rubio, L., and Daròs, J.A. (2010) Simultaneous equimolar  
304 expression of multiple proteins in plants from a disarmed potyvirus vector. *J.*

- 305 *Biotechnol.*, **150**, 268–275.
- 306 Bernabé-Orts, J.M., Casas-Rodrigo, I., Minguet, E.G., Landolfi, V., Garcia-Carpintero, V.,  
307 Gianoglio, S., et al. (2019) Assessment of Cas12a-mediated gene editing efficiency in  
308 plants. *Plant Biotechnol. J.*, **17**, 1971–1984.
- 309 Cody, W.B., Scholthof, H.B., and Mirkov, T.E. (2017) Multiplexed gene editing and protein  
310 overexpression using a tobacco mosaic virus viral vector. *Plant Physiol.*, **175**, 23–35.
- 311 Cong, L., Ran, F.A., Cox, D., Lin, S., Barretto, R., Habib, N., et al. (2013) Multiplex genome  
312 engineering using CRISPR/Cas systems. *Science (80-. )*, **339**, 819–823.
- 313 Dickmeis, C., Fischer, R., and Commandeur, U. (2014) Potato virus X-based expression  
314 vectors are stabilized for long-term production of proteins and larger inserts. *Biotechnol.*  
315 *J.*, **9**, 1369–1379.
- 316 Ellison, E.E., Nagalakshmi, U., Gamo, M.E., Huang, P. jui, Dinesh-Kumar, S., and Voytas,  
317 D.F. (2020) Multiplexed heritable gene editing using RNA viruses and mobile single  
318 guide RNAs. *Nat. Plants*, **6**, 620–624.
- 319 Endo, A., Masafumi, M., Kaya, H., and Toki, S. (2016) Efficient targeted mutagenesis of rice  
320 and tobacco genomes using Cpf1 from *Francisella novicida*. *Sci. Rep.*, **6**, 38169.
- 321 Gilbertson, R.L., Sudarshana, M., Jiang, H., Rojas, M.R., and Lucas, W.J. (2003) Limitations  
322 on Geminivirus Genome Size Imposed by Plasmodesmata and Virus-Encoded  
323 Movement Protein: Insights into DNA Trafficking. *Plant Cell*, **15**, 2578–2591.
- 324 Hu, J., Li, S., Li, Z., Li, H., Song, W., Zhao, H., et al. (2019) A barley stripe mosaic virus-  
325 based guide RNA delivery system for targeted mutagenesis in wheat and maize. *Mol.*  
326 *Plant Pathol.*, **20**, 1463–1474.
- 327 Huang, T.K. and Puchta, H. (2021) Novel CRISPR/Cas applications in plants: from prime  
328 editing to chromosome engineering. *Transgenic Res.*
- 329 Jackson, A.O. and Christie, S.R. (1977) Purification and some physicochemical properties of  
330 sonchus yellow net virus. *Virology*, **77**, 344–355.
- 331 Jiang, N., Zhang, C., Liu, J.Y., Guo, Z.H., Zhang, Z.Y., Han, C.G., and Wang, Y. (2019)  
332 Development of Beet necrotic yellow vein virus-based vectors for multiple-gene  
333 expression and guide RNA delivery in plant genome editing. *Plant Biotechnol. J.*, **17**,  
334 1302–1315.
- 335 Kim, D., Kim, J., Hur, J.K., Been, K.W., Yoon, S.-H., and Kim, J.-S. (2016) Genome-wide  
336 analysis reveals specificities of Cpf1 endonucleases in human cells. *Nat. Biotechnol.*, **34**,  
337 863–8.
- 338 Kim, H., Kim, S.T., Ryu, J., Kang, B.C., Kim, J.S., and Kim, S.G. (2017) CRISPR/Cpf1-

- 339 mediated DNA-free plant genome editing. *Nat. Commun.*, **8**, 14406.
- 340 Kim, H.K., Song, M., Lee, J., Menon, A.V., Jung, S., Kang, Y.M., et al. (2017) In vivo high-  
341 throughput profiling of CRISPR-Cpf1 activity. *Nat. Methods*, **14**, 153–159.
- 342 Lau, C.H. and Suh, Y. (2017) In vivo genome editing in animals using AAV-CRISPR system:  
343 Applications to translational research of human disease. *F1000Research*, **6**, 2153.
- 344 Lei, J., Dai, P., Li, Y., Zhang, W., Zhou, G., Liu, C., and Liu, X. (2021) Heritable gene  
345 editing using FT mobile guide RNAs and DNA viruses. *Plant Methods*, **17**.
- 346 Li, J., Zhang, H., Si, X., Tian, Y., Chen, K., Liu, J., et al. (2017) Generation of  
347 thermosensitive male-sterile maize by targeted knockout of the ZmTMS5 gene. *J. Genet.*  
348 *Genomics*, **44**, 465–468.
- 349 Loebenstein, G. and Gaba, V. (2012) Viruses of Potato. In: *Advances in Virus Research*, pp.  
350 209–246. Academic Press Inc.
- 351 Ma, X., Zhang, X., Liu, H., and Li, Z. (2020) Highly efficient DNA-free plant genome editing  
352 using virally delivered CRISPR–Cas9. *Nat. Plants*, **6**, 773–779.
- 353 Majer, E., Llorente, B., Rodríguez-Concepción, M., and Daròs, J.A. (2017) Rewiring  
354 carotenoid biosynthesis in plants using a viral vector. *Sci. Rep.*, **7**, 41645.
- 355 Martí, M., Diretto, G., Aragonés, V., Frusciante, S., Ahrazem, O., Gómez-Gómez, L., and  
356 Daròs, J.A. (2020) Efficient production of saffron crocins and picrocrocin in *Nicotiana*  
357 *benthamiana* using a virus-driven system. *Metab. Eng.*, **61**, 238–250.
- 358 Nekrasov, V., Staskawicz, B., Weigel, D., Jones, J.D.G., and Kamoun, S. (2013) Targeted  
359 mutagenesis in the model plant *Nicotiana benthamiana* using Cas9 RNA-guided  
360 endonuclease. *Nat. Biotechnol.*, **31**, 691–693.
- 361 Peng, X., Ma, X., Lu, S., and Li, Z. (2021) A Versatile Plant Rhabdovirus-Based Vector for  
362 Gene Silencing, miRNA Expression and Depletion, and Antibody Production. *Front.*  
363 *Plant Sci.*, **11**, 627880.
- 364 Platt, R.J., Chen, S., Zhou, Y., Yim, M.J., Swiech, L., Kempton, H.R., et al. (2014) CRISPR-  
365 Cas9 knockin mice for genome editing and cancer modeling. *Cell*, **159**, 440–455.
- 366 Senís, E., Fatouros, C., Große, S., Wiedtke, E., Niopek, D., Mueller, A.-K., et al. (2014)  
367 CRISPR/Cas9-mediated genome engineering: an adeno-associated viral (AAV) vector  
368 toolbox. *Biotechnol. J.*, **9**, 1402–12.
- 369 Tang, X., Lowder, L.G., Zhang, T., Malzahn, A.A., Zheng, X., Voytas, D.F., et al. (2017) A  
370 CRISPR-Cpf1 system for efficient genome editing and transcriptional repression in  
371 plants. *Nat. Plants*, **3**, 17103.
- 372 Uranga, M., Aragonés, V., Selma, S., Vázquez-Vilar, M., Orzáez, D., and Daròs, J. (2021)

- 373 Efficient Cas9 multiplex editing using unspaced sgRNA arrays engineering in a Potato  
374 virus X vector. *Plant J.*
- 375 Wang, M., Mao, Y., Lu, Y., Tao, X., and Zhu, J.-K. (2017) Multiplex Gene Editing in Rice  
376 Using the CRISPR-Cpf1 System. *Mol. Plant*, **10**, 1011–1013.
- 377 Wylie, S.J., Adams, M., Chalam, C., Kreuze, J., López-Moya, J.J., Ohshima, K., et al. (2017)  
378 ICTV virus taxonomy profile: Potyviridae. *J. Gen. Virol.*, **98**, 352–354.
- 379 Xu, C.L., Ruan, M.Z.C., Mahajan, V.B., and Tsang, S.H. (2019) Viral delivery systems for  
380 CRISPR. *Viruses*, **11**, 28.
- 381 Xu, R., Qin, R., Li, H., Li, D., Li, L., Wei, P., and Yang, J. (2017) Generation of targeted  
382 mutant rice using a CRISPR-Cpf1 system. *Plant Biotechnol. J.*, **15**, 713–717.
- 383 Yin, K., Han, T., Liu, G., Chen, T., Wang, Y., Yu, A.Y.L., and Liu, Y. (2015) A geminivirus-  
384 based guide RNA delivery system for CRISPR/Cas9 mediated plant genome editing. *Sci.*  
385 *Rep.*, **5**, 14926.
- 386 Zahir Ali, Aala Abul-faraj, Lixin Li, Neha Ghosh, Marek Piatek, Ali Mahjoub, Mustapha  
387 Aouida, Agnieszka Piatek, Nicholas J Baltes, Daniel F Voytas, Savithramma Dinesh-  
388 Kumar, M.M.M. (2015) Efficient Virus-Mediated Genome Editing in Plants Using the  
389 CRISPR/Cas9 System. *Mol. Plant*, **8**, 1288–91.
- 390 Zaidi, S.S.-A., Magdy M. Mahfouz, A., and Mansoor, S. (2017) CRISPR-Cpf1: A New Tool  
391 for Plant Genome Editing. *Trends Plant Sci.*, **22**, 549–550.
- 392 Zaidi, S.S. e. A., Mahfouz, M.M., and Mansoor, S. (2017) CRISPR-Cpf1: A New Tool for  
393 Plant Genome Editing. *Trends Plant Sci.*, **22**, 550–553.
- 394 Zetsche, B., Gootenberg, J.S., Abudayyeh, O.O., Slaymaker, I.M., Makarova, K.S.,  
395 Essletzbichler, P., et al. (2015) Cpf1 Is a Single RNA-Guided Endonuclease of a Class 2  
396 CRISPR-Cas System. *Cell*, **163**, 759–771.
- 397 Zetsche, B., Heidenreich, M., Mohanraju, P., Fedorova, I., Kneppers, J., Degennaro, E.M., et  
398 al. (2017) Multiplex gene editing by CRISPR-Cpf1 using a single crRNA array. *Nat.*  
399 *Biotechnol.*, **35**, 31–34.
- 400 Zhang, Y., Liang, Z., Zong, Y., Wang, Y., Liu, J., Chen, K., et al. (2016) Efficient and  
401 transgene-free genome editing in wheat through transient expression of CRISPR/Cas9  
402 DNA or RNA. *Nat. Commun.*, **7**, 12617.
- 403 Zhu, H., Li, C., and Gao, C. (2020) Applications of CRISPR–Cas in agriculture and plant  
404 biotechnology. *Nat. Rev. Mol. Cell Biol.*, **21**, 661–677.
- 405
- 406

407 **Figures**

408

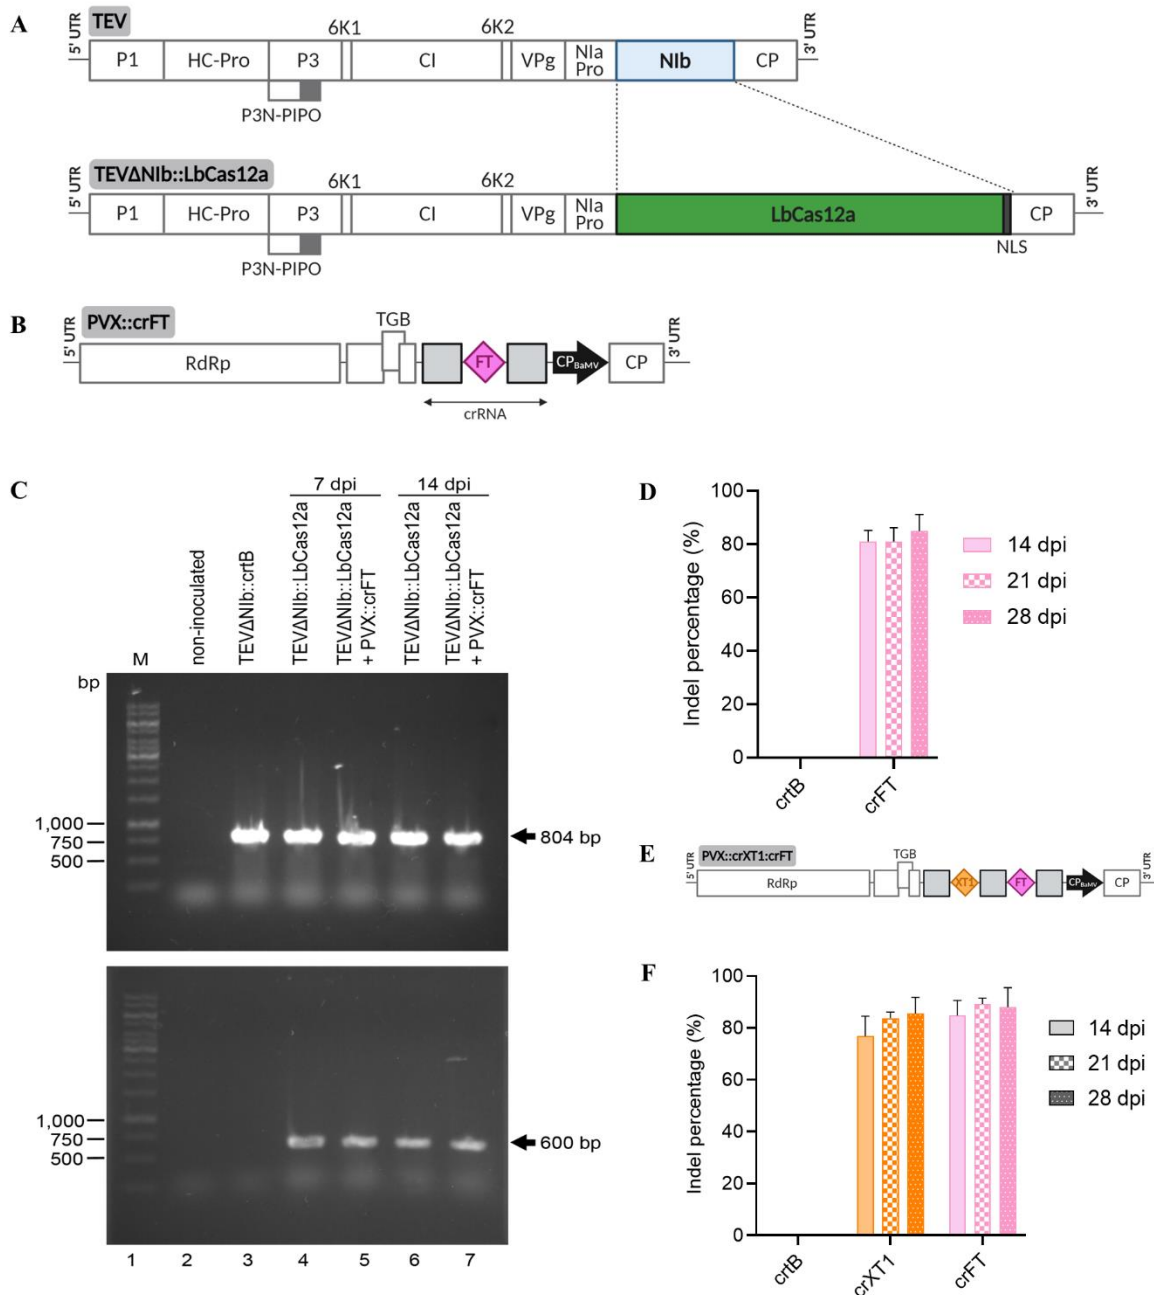

409

410 **FIG. 1.** DNA-free gene editing in *N. benthamiana* based on virally delivered LbCas12a and  
 411 crRNA. **(A)** Schematic representation of recombinant virus TEVΔNIb::LbCas12a. Cas12a ORF  
 412 from *Lachnospiraceae bacterium* ND2006 (LbCas12a), containing a carboxy-terminal  
 413 nucleoplasmic nuclear localization signal (NLS, grey box), replaces the TEV Nib cistron (light  
 414 blue box) and is flanked by proteolytic processing sites of viral NIaPro. TEV cistrons P1, HC-  
 415 Pro, P3, P3N-PIPO, 6K1, CI, 6K2, VPg, NIaPro, Nib, and CP are represented by boxes. 5' and  
 416 3' untranslated regions (UTRs) are represented by lines. **(B)** Schematic representation of

417 recombinant clone PVX::crFT. RNA-dependent RNA polymerase (RdRp), triple gene block  
418 (TGB), and coat protein (CP) are represented by open boxes. Heterologous *Bamboo mosaic*  
419 *virus* CP promoter (CP<sub>BaMV</sub>) is represented by a black arrow. 5' and 3' UTRs are represented  
420 by black lines. crRNA consists of a gene-specific 23-nt protospacer (pink diamond) and  
421 conserved 21-nt direct repeats (grey boxes). CP<sub>BaMV</sub>, protospacer and scaffold are not shown at  
422 scale. **(C)** RT-PCR analysis of TEVΔNIb progeny at 7 and 14 dpi in 35S::NIb *N. benthamiana*  
423 plants inoculated with TEVΔNIb::LbCas12a alone or co-inoculated with TEVΔNIb::LbCas12a  
424 and PVX::crFT. Amplification products were separated by electrophoresis in an agarose gel  
425 stained with ethidium bromide. Lane 1, 1-kb ladder DNA marker with the length of some  
426 components (in bp) indicated on the left; lane 2, non-inoculated plant; lanes 3 to 7, plants  
427 inoculated with TEVΔNIb::crtB (lane 3) or TEVΔNIb::LbCas12a (lanes 4 and 6), and co-  
428 inoculated with TEVΔNIb::LbCas12a and PVX::crFT (lanes 5 and 7). The amplification  
429 products corresponding to cDNA regions of TEV CP (804 bp) (top) or LbCas12a (600 bp)  
430 (bottom) are indicated by arrows. **(D)** ICE analysis of the first systemically infected upper leaf  
431 of *N. benthamiana* plants co-inoculated with TEVΔNIb::LbCas12a and PVX::crFT at the  
432 indicated dpi (n=6). TEVΔNIb::crtB was used as a negative control. **(E)** Schematic  
433 representation of recombinant clone PVX::crXT1:crFT. Protospacers for NbXT1 and NbFT are  
434 represented by orange and pink diamonds, respectively. Other details are indicated above. **(F)**  
435 ICE analysis of the first systemically infected upper leaf of *N. benthamiana* plants (n=6) co-  
436 inoculated with TEVΔNIb::LbCas12a and PVX::crXT1:crFT at the indicated dpi. Columns and  
437 error bars represent average indels (%) and standard deviation, respectively.



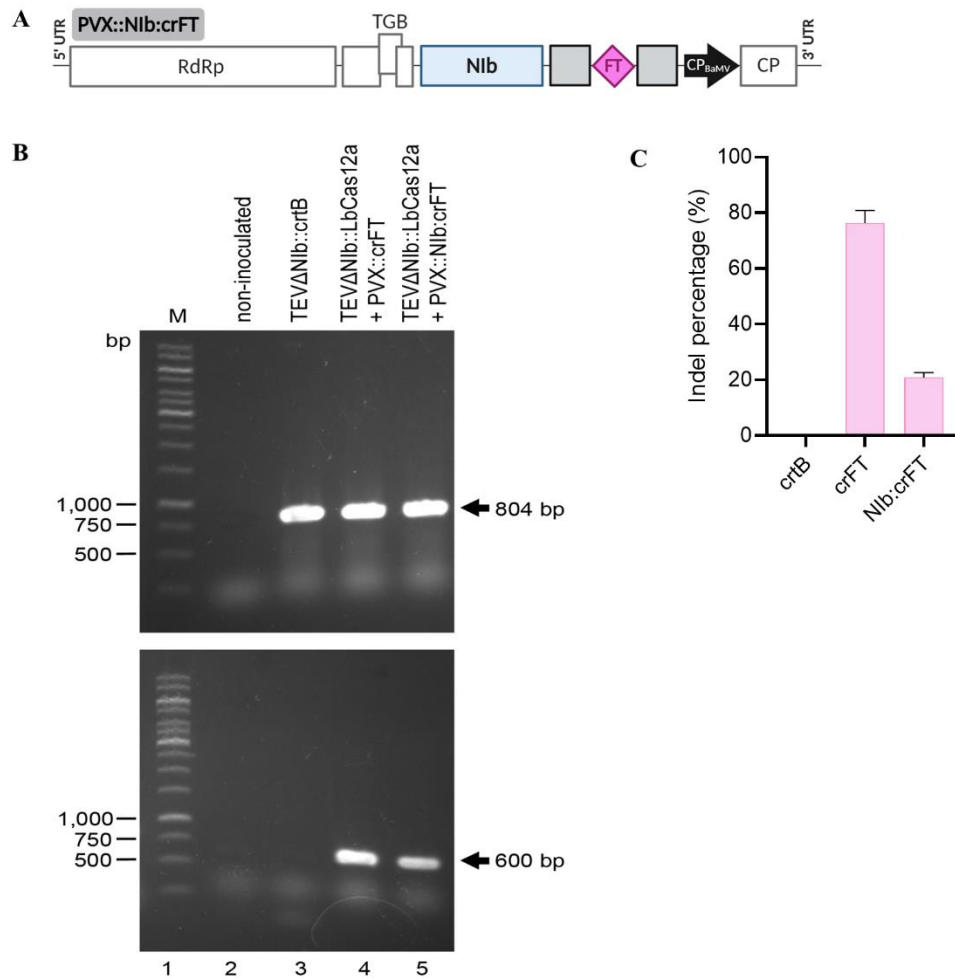

438

439 **FIG. 2.** Engineering of a single PVX vector for complementation of defective TEVΔNIb and  
 440 expression of LbCas12a crRNA. **(A)** Schematic representation of recombinant virus  
 441 PVX::NIb:crFT. TEV Nib cistron is represented by a light blue box. Other details are as  
 442 described in the legend to Fig. 1. **(B)** RT-PCR analysis of TEVΔNIb progeny at 14 dpi in wild-  
 443 type *N. benthamiana* plants co-inoculated with TEVΔNIb::LbCas12a and PVX::crFT or with  
 444 TEVΔNIb::LbCas12a and PVX::NIb:crFT. Amplification products were separated by  
 445 electrophoresis in an agarose gel that was stained with ethidium bromide. Lane 1, DNA marker  
 446 ladder with the length of some components (in bp) indicated on the left; lane 2, non-inoculated  
 447 plant; lane 3 to 5, plants inoculated with TEVΔNIb::crtB (lane 3) and co-inoculated with  
 448 TEVΔNIb::LbCas12a and PVX::crFT (lane 4) or with TEVΔNIb::LbCas12a and  
 449 PVX::NIb:crFT (lane 5). The amplification products corresponding to cDNA regions of TEV  
 450 CP (804 bp) (top) or LbCas12a (600 bp) (bottom) are indicated by arrows. **(c)** ICE analysis of  
 451 the first systemically infected upper leaf of *N. benthamiana* plants co-inoculated with  
 452 TEVΔNIb::LbCas12a and PVX::NIb:crFT at 14 dpi (n=6). TEVΔNIb::crtB was used as a

453 negative control. Columns and error bars represent average indels (%) and standard deviation,  
454 respectively.

455

456  
457  
458  
459  
460  
461  
462  
463  
464  
465  
466  
467  
468  
469  
470  
471  
472  
473  
474  
475  
476  
477  
478  
479  
480  
481  
482  
483  
484  
485  
486  
487  
488  
489  
490  
491  
492  
493  
494  
495  
496  
497  
498  
499  
500  
501  
502  
503  
504

## SUPPLEMENTAL DATA

### CRISPR-Cas12a genome editing at the whole-plant level using two compatible RNA virus vectors

Mireia Uranga, Marta Vazquez-Vilar, Diego Orzáez, and José-Antonio Daròs\*

*Instituto de Biología Molecular y Celular de Plantas (Consejo Superior de Investigaciones Científicas-Universitat Politècnica de València), Valencia, Spain*

\*Address correspondence to: *José-Antonio Daròs, IBMCP (CSIC-Universitat Politècnica de València), Avenida de los Naranjos s/n, 46022 Valencia, Spain.*

**Figure S1.** Full sequence of the wild-type tobacco etch virus (TEV), the defective viral vector TEV $\Delta$ N1b and their derived recombinant viruses, TEV $\Delta$ N1b::crtB and TEV $\Delta$ N1b::LbCas12a. TEV-wt sequence corresponds to Genbank accession number DQ986288 including two silent mutations (G273A and A1119G, in red). Limits between TEV cistrons are marked on blue background. cDNAs corresponding to *P. ananatis* phytoene synthase (crtB) and Cas12a from *Lachnospiraceae bacterium ND2006* (LbCas12a) are on yellow and dark green backgrounds, respectively. Nucleoplasmin nuclear localization signal (NLS) and human influenza hemagglutinin (3xHA) tag are underlined and dotted, respectively. In the inserted cDNAs, sequences corresponding to native and artificial TEV NIaPro cleavage sites are in black or blue, respectively.

#### >TEV

```
AAAATAACAAATCTCAACACAACATATACAAAAACAAACGAATCTCAAGCAATCAAGCATTCTACTTCTATTGCAG
CAATTTAAATCATTTCTTTTAAAGCAAAAGCAATTTTCTGAAAATTTTACCATTACGAACGATAGCCATGGCA
CTCATCTTTGGCACAGTCAACGCTAACATCCTGAAGGAAGTGTTCGGTGGAGCTCGTATGGCTTGCCTTACCAGC
GCACATATGGCTGGAGCGAATGGAAGCATTTTGAAGAAGGCAGAAGAACCTCTCGTGCAATCATGCACAAACCA
GTGATCTTCGGAGAAGACTACATTACCGAGGCAGACTTGCCTTACACACCACTCCATTTAGAGGTCGATGCTGAA
ATGGAGCGGATGTATTATCTTGGTTCGTCGCGCGCTCACCCATGGCAAGAGACGCAAAGTTTCTGTGAATAACAAG
AGGAACAGGAGAAGGAAAGTGGCCAAAACGTACGTGGGGCGTGATTCCATTGTTGAGAAGATTGTAGTGCCCCAC
ACCGAGAGAAAGGTTGATACCACAGCAGCAGTGGAAAGACATTTGCAATGAAGCTACCACTCAACTTGTGCATAAT
AGTATGCCAAAGCGTAAGAAGCAGAAAAACTTCTTGCCCGCCACTTCACTAAGTAACGTGTATGCCAAAACCTGG
AGCATAGTGCGCAAACGCCATATGCAGGTGGAGATCATTAGCAAGAAGAGCGTCCGAGCGAGGGTCAAGAGATTT
GAGGGCTCGGTGCAATTGTTTCGCAAGTGTGCGTCACATGTATGGCGAGAGGAAAAGGGTGGACTTACGTATTGAC
AACTGGCAGCAAGAGACACTTCTAGACCTTGCTAAAAGATTTAAGAATGAGAGAGTGGATCAATCGAAGCTCACT
TTTGGTTCAAGTGGCCTAGTTTTGAGGCAAGGCTCGTACGGACCTGCGCATTGGTATCGACATGGTATGTTTCATT
GTACGCGGTCGGTTCGGATGGGATGTTGGTGGATGCTCGTTCGGAAGGTAACGTTTCGCTGTTTGTCACTCAATGACA
CATTATAGCGACAAATCAATCTCTGAGGCATTCTTCATACCATACTTAAGAAATCTTGGAGTTGAGCCAGAT
GGAATCTCCCATGAGTGTACAAGAGGAGTATCAGTTGAGCGGTGCGGTGAGGTGGCTGCAATCTTGACACAAGCA
CTTTACCGTGTGGTAAGATCACATGCAAACGTTGCATGGTTGAAACACCTGACATTGTTGAGGGTGAGTCGGGA
GACAGTGTACCAACCAAGGTAAGCTCCTAGCAATGCTGAAAAGAACAGTATCCAGATTTCCCAATGGCCGAGAAA
CTACTCACAAGGTTTTTGCAACAGAAATCACTAGTAAATACAAATTTGACAGCCTGCGTGAGCGTCAAAACAACCTC
ATTGGTGACCGCAAACAAGCTCCATTCACACACGTAAGTGGCTGTGAGCGAAATTTCTGTTTAAAGGCAATAAACTA
ACAGGGGCGGATCTCGAAGAGGCAAGCACACATATGCTTGAATAGCAAGGTTCTTGAACAATCGCACTGAAAAT
ATGCGCATTGGCCACCTTGGTTCTTTTCAGAAATAAAATCTCATCGAAGGCCCATGTGAATAACGCACTCATGTGT
GATAATCAACTTGATCAGAATGGGAATTTTATTTGGGGACTAAGGGGTGCACACGCAAAGAGTTTCTTAAAGGA
```

505 TTTTTCCTGAGATTGACCCAAATGAAGGATACGATAAGTATGTTATCAGGAAACATATCAGGGGTAGCAGAAAG  
506 CTAGCAATTGGCAATTTGATAATGTCAACTGACTTCCAGACGCTCAGGCAACAAATTCAGGCGAAACTATTGAG  
507 CGTAAAGAAATTGGGAATCACTGCATTTCAATGCGGAATGGTAATTACGTGTACCCATGTTGTTGTTACTCTT  
508 GAAGATGGTAAGGCTCAATATTCGGATCTAAAGCATCCAACGAAGAGACATCTGGTCATTGGCAACTCTGGCGAT  
509 TCAAAGTACCTAGACCTTCCAGTTCTCAATGAAGAGAAAATGTATATAGCTAATGAAGGTTATTGCTACATGAAC  
510 ATTTTCTTTGCTCTACTAGTGAATGTCAAGGAAGAGGATGCAAAGGACTTCACCAAGTTTATAAGGGACACAATT  
511 GTTCCAAAGCTTGGAGCGTGGCCAACAATGCAAGATGTTGCAACTGCATGCTACTTACTTTCCATTTCTTTACCCA  
512 GATGTCCTGAGTGTGAATTACCCAGAATTTTGGTTGATCATGACAACAAAACAATGCATGTTTTGGATTTCGTAT  
513 GGGTCTAGAACGACAGGATACCACATGTTGAAAATGAACACAACATCCCAGCTAATTGAATTCGTTCAATTCAGGT  
514 TTGGAATCCGAAATGAAAACCTTACAATGTTGGAGGATGAACCGAGATATGGTCACACAAGTGCATTTGAGATG  
515 TTGATCAAGTCCATATACAAACCACATCTCATGAAGCAGTTACTTGAGGAGGAGCCATACATAAATTGCTGGCA  
516 ATAGTCTCCCCTTCAATTTTAATTGCCATGTACAACCTCTGGAACTTTTGAGCAGGCGTTACAAAATGTGGTTGCCA  
517 AATACAATGAGGTTAGCTAACCTCGCTGCCATCTTGTGAGCCTTGGCGCAAAAAGTTAACTTTGGCAGACTTGTTC  
518 GTCCAGCAGCGTAATTTGATTAATGAGTATGCGCAGGTAATTTTGGACAATCTGATTGACGGTGTGAGGGTTAAC  
519 CATTGCTATCCCTAGCAATGGAAATTTGTTACTATTAAGCTGGCCACCAAGAGATGGACATGGCGTTGAGGGAA  
520 GGTGGCTATGCTGTGACCTCTGAAAAGGTGCATGAAATGTTGAAAAAAACTATGTAAAGGCTTTGAAGGATGCA  
521 TGGGACGAATTAACCTGGTTGGAAAAATTTCTCCGCAATCAGGCATTCAGAAAAGCTCTTGAATTTGGCGAAAAG  
522 CCTTTAATCATGAAAAACACCGTAGATTGCGGGCGGACATATAGACTTGTCTGTGAAATCGCTTTTCAAGTTCAC  
523 TTGGAACCTCCTGAAGGGAACCATCTCAAGAGCCGTAAATGGTGGTGCAAGAAAAGGTAAGAGTAGCGAAGAATGCC  
524 ATGACAAAAGGGGTTTTTCTCAAATCTACAGCATGCTTCCCTGACGCTTACAAGTTTATCACAGTCTCGAGTGT  
525 CTTTCCTTGTGTTGACATTTTATTTCAAATTTGACTGCATGATAAGGGCACACCGAGAGGCGAAGGTTGCTGCA  
526 CAGTTGCAGAAAGAGAGCGAGTGGGACAATATCATCAATAGAACTTTCCAGTATTCTAAGCTTGAAAACTCTATT  
527 GGCTATCGCTCTACAGCGGAGGAAAGACTCCAATCAGAACACCCCGAGGCTTTTCGAGTACTACAAGTTTTCATC  
528 GGAAAGGAAGACCTCGTTGAACAAGGCAAAACAACCGGAGATAGCATACTTTGAAAAGATTATAGCTTTTCAAC  
529 CTTGTATTAATGGCTTTTTCAGCTGAGCGGAGTGTGAGTGTTCAGATACTCAATAAGTTCAAAGGAATACTG  
530 AGCTCAACCGGAGGAGATCATCTACACGCAAGTTTGGATGATTACGTTACAACCTTTGATGACAATATGACA  
531 ATCAACCTCGAGTTGAATATGGATGAACCTCACAAGACGACCTTCTGGAGTCACTTTAAGCAATGTTGGAAC  
532 AACCAATCAGCCGAGGCAACGTGAAGCCACATTAATAGAACTGAGGGGCATTCATGGAGTTTACCAGAGATACT  
533 GCGGCATCGGTTGCCAGCGAGATATCACACTACCCGCAAGAGATTTTTCTTGTGAGAGGTGCTGTTGGATCTGGA  
534 AAATCCACAGGACTTCCATAACCATTTATCAAAGAGAGGGAGAGTGTAAATGCTTGGACCTACCAGACCACTCACA  
535 GATAACGTGCACAAGCAACTGAGAAGTGAACCATTTAACTGCTTCCCAACTTTGAGGATGAGAGGGAAAGTCAACT  
536 TTTGGGTGATCACCGATTACAGTCACTAGTGGATTTCGCTTTACACCATTTTGCACGAAACATAGCTGAGGTA  
537 AAAACATACGATTTTGTGATAATTGATGAATGTGATGATGCTTCTGCTATAGCGTTTAGGAATCTACTG  
538 TTTGAACATGAATTTGAAGGAAAAGTCTCAAAGTGTGAGCCACACCAGGTAGAGAAGTTGAATTCACAAC  
539 CAGTTTCCCGTGAACCTCAAGATAGAAGAGGCTCTTAGCTTTCAGGAATTTGTAAGTTTACAAGGGACAGGTGCC  
540 AACGCCGATGTGATTAGTTGTGGCGACAACATACTAGTATATGTTGCTAGCTACAATGATGTTGATAGTCTTGGC  
541 AAGCTCCTTGTGCAAAAGGGATACAAAGTGTGCAAGATTGATGGAAGAACAATGAAGAGTGGAGGAACTGAAATA  
542 ATCACTGAAGGTAATTCAGTGA AAAAGCATTTCATAGTCGCAACTAATATTATTGAGAATGGTGTAAACCATTGAC  
543 ATTGATGTAGTTGTGGATTTTGGGACTAAGGTTGTACCAGTTTGGATGTGGACAATAGAGCGGTGCAGTACAAC  
544 AAAACTGTGGTGAGTTATGGGGAGCGCATCCAAAGACTCGGTAGAGTTGGGCGACACAAGGAAGGAGTAGCACTT  
545 CGAATTGGCCAAACAATAAAACACTGGTTGAAATTCAGAAATGGTTGCCACTGAAGCTGCCTTTCTATGCTTC  
546 ATGTACAATTTGCCAGTGACAACACAGAGTGTTCACACACTGCTGGAAAATGCCACATTAATACAAGCTAGA  
547 ACTATGGCACAGTTGAGCTATCATATTTTACACAATTAATTTGTGCGATTGATGGTAGTATGCATCCAGTC  
548 ATACATGACAAGCTGAAGCGCTTAAAGCTACACACTGTGAGACATTCCTCAATAAGTTGGCGATCCCAATAAA  
549 GGCTTACTCTTGGCTTACGAGTGGAGAGTATAAGCGACTTGGTTACATAGCAGAGGATGCTGGCATTAAGAATC  
550 CCATTCGTGTGCAAAAGAAATTCAGACTCCTTGCATGAGGAAATTTGGCACATTGTAGTCCGCCATAAAGGTGAC  
551 TCGGGTATTGGGAGGCTCACTAGCGTACAGGCAGCAAAGGTTGTTTATACTCTGCAAAACGGATGTGCACTCAATT  
552 GCGAGGACTCTAGCATGCATCAATAGACTCATAGCACATGAACAAAATGAAGCAGAGTCATTTTGAAGCCGCAACT  
553 GGGAGAGCATTTTCTTCCAAATTACTCAATACAAAGCATATTTGACACGCTGAAAGCAAAATATGCTACAAAAG  
554 CATAAGAAAGAAAATATTGCAGTGTTCAGCAGGCAAAAGATCAATTGCTAGAGTTTTCGAACTAGCAAAGGAT  
555 CAAGATGTCACGGGTATCATCCAAGACTTCAATCACCTGGAAACTATCTATCTCAAATCAGATAGCGAAGTGGCT  
556 AAGCATCTGAAGCTTAAAAGTCACTGGAATAAAAAGCCAAATCACTAGGGACATCATAATAGCTTTGTCTGTGTTA  
557 ATTGGTGGTGGATGGATGCTTGAACGTAACCTCAAGGACAAGTTCAATGAACCAGTCTATTTCCAAGGGAAGAAG  
558 AATCAGAAGCACAAGCTTAAAGATGAGAGAGGCGCGTGGGGCTAGAGGGCAATATGAGGTTGCAGCGGAGCCAGAG  
559 GCGCTAGAACATTACTTTGGAAGCGCATATAATAACAAAGGAAAGCGCAAGGGCACCACGAGAGGAATGGGTGCA  
560 AAGTCTCGGAAATTCATAAACATGTATGGGTTTGTATCCAATGATTTTTTCATACATTAGGTTTGTGGATCCATTG  
561 ACAGGTCACACTATTGATGAGTCCACAAACGCACCTATTGATTTAGTGCAGCATGAGTTTGGAAAAGGTTAGAACA  
562 CGCATGTTAATTGACGATGAGATAGAGCCTCAAAGTCTTAGCACCCACACCACAATCCATGCTTATTTGGTGAAT  
563 AGTGGCACGAAGAAAGTTCTTAAGGTTGATTTAACACCACACTCGTTCGCTACGTGCGAGTGAAGAAATCAACAGCA  
564 ATAATGGGATTTCTGAAAGGGAGAATGAATGCGTCAAACCGGCATGGCAGTGCAGTGGCTTATGATCAATTG  
565 CCACCAAAGAGTGAGGACTTGCAGTTTGAAGGAGAAAGCTTGTTTAAGGGACCACGTGATTACAACCCGATATCG

566 AGCACCATTTGTCACCTTGACGAATGAATCTGATGGGCACACAACATCGTTGTATGGTATTGGATTTGGTCCCTTC  
567 ATCATTACAAACAAGCACTTGTTTAGAAAGAAATAATGGAACACTGTTGGTCCAATCACTACATGGTGTATTCAAAG  
568 GTCAAGAACCACGACTTTGCAACAACACCTCATTGATGGGAGGGACATGATAATTATTTCGCATGCCAAGGAT  
569 TTCCCACCATTTCTCAAAGCTGAAATTTAGAGAGCCACAAAGGGAAGAGCGCATATGTCTTGTGACAACCAAC  
570 TTCCAAACTAAGAGCATGTCTAGCATGGTGTGAGACTAGTTGCACATTCCTTTCATCTGATGGCATAATTCTGG  
571 AAGCATTGGATTCAAACCAAGGATGGGCAGTGTGGCAGTCCATTAGTATCAACTAGAGATGGGTTTCATTGTTGGT  
572 ATACACTCAGCATCGAATTTACCAACACAACAATTATTTACAAGCGTGCCGAAAACTTCATGGAAATTGTTG  
573 ACAAAATCAGGAGGCGCAGCAGTGGGTTAGTGGTTGGCGATTAAATGCTGACTCAGTATTGTGGGGGGGCCATAAA  
574 GTTTTCATGAGCAAACCTGAAGAGCCTTTTCAGCCAGTTAAGGAAGCGACTCAACTCATGAGTGAATTGTTGTAC  
575 TCGCAAGGGGAGAAGAGGAAATGGGTCGTGGAAGCACTGTGAGGAACTTGAGGCCAGTGGCTGAGTGTCCCAGT  
576 CAGTTAGTCACAAAGCATGTGGTTAAAGGAAAGTGTCCCTCTTTGAGCTCTACTTGCAGTTGAATCCAGAAAAG  
577 GAAGCATATTTTAAACCGATGATGGGAGCATATAAGCCAAGTCGACTTAATAGAGAGGCGTTCTCAAGGACATT  
578 CTAAAATATGCTAGTGAAATTGAGATTGGGAATGTGGATTGTGACTTGCTGGAGCTTGCAATAAGCATGCTCATC  
579 ACAAAGCTCAAGGCGTTAGGATTCCCAACTGTGAACTACATCACTGACCCAGAGGAAAATTTTGTAGTGCATTGAAT  
580 ATGAAAGCAGCTATGGGAGCACTATACAAAGGCAAGAAGAAAGCTCTCAGCGAGCTCACACTAGATGAGCAG  
581 GAGGCAATGCTCAAAGCAAGTTGCCTGCGACTGTATACGGGAAAGCTGGGAATTTGGAATGGCTCATTGAAAGCA  
582 GAGTTGCGTCCAATTGAGAAGGTTGAAAACAACAAAACGCGAACTTTCACAGCAGCACCAATAGACTCTTCTT  
583 GCTGGTAAAGTTTTCGTTGGATGATTTCAACAATCAATTTTATGATCTCAACATAAAGGCACCATTGACAGTTGGT  
584 ATGACTAAGTTTTATCAGGGGTGGAATGAATTGATGGAGGCTTTACCAAGTGGGTGGGTGTATTGTGACGCTGAT  
585 GGTTTCGCAATTCGACAGTTTCTTGACTCCATTCTCATTAAATGCTGTATTGAAAAGTGCAGCTTGCTTTCATGGAG  
586 GAATGGGATATTGGTGAGCAAATGCTGCGAAATTTGTACACTGAGATAGTGTATACACCAATCTTCACACCGGAT  
587 GGTACTATCATTAAGAAGCATAAAGGCAACAATAGCGGGCAACCTTCAACAGTGGTGGACAACACACTCATGGTC  
588 ATTATTGCAATGTTATACACATGTGAGAAGTGTGGAATCAACAAGGAAGAGATTGTGTATTACGTCAATGGCGAT  
589 GACCTATTGATTGCCATTCACCCAGATAAAGCTGAGAGGTTGAGTGGATTCAAAGAATCTTTCGGAGAGTTGGGC  
590 CTGAAATATGAATTTGACTGCACCACCAGGGACAAGACACAGTTGTGGTTCATGTACACAGGGCTTTGGAGAGG  
591 GATGGCATGTATATACAAAGCTAGAAAGAAAGAAAGGATGTTTCTATTTTGAATGGGACAGATCCAAAGAGCCG  
592 TCACATAGGCTTGAAGCCATCTGTGCATCAATGATCGAAGTGGGGTTATGACAAGCTGGTGAAGAAAATCCGC  
593 AATTTCTATGCATGGGTTTTTGAACAAGCGCCGTATTCACAGCTTGCAGAAGAAGGAAAGGCCCATATCTGGCT  
594 GAGACTGCGCTTAAGTTTTTGTACACATCTCAGCACGGAACAACTCTGAGATAGAAGAGTATTTAAAAGTGTTG  
595 TATGATTACGATATTCCAACGACTGAGAATCTTTATTTTCAAGTGGCACTGTGGGTGCTGGTGTGACGCTGGT  
596 AAGAAGAAAGATCAAAGGATGATAAAGTCGCTGAGCAGGCTTCAAAGGATAGGGATGTTAATGCTGGAACCTTCA  
597 GGAACATTCTCAGTTCACGAATAAATGCTATGGCCACAAAACCTTCAATATCCAAGGATGAGGGGAGAGGTGGTT  
598 GTAAACTTGAATCACCTTTTAGGATACAAGCCACAGCAAATTTGATTTGTCAAATGCTCGAGCCACACATGAGCAG  
599 TTTGCCGCGTGGCATCAGGCAGTGTGACAGCCTATGGAGTGAATGAAGAGCAAATGAAAATATTGCTAAATGGA  
600 TTTATGGTGTGGTGCATAGAAAATGGGACTTCCCCAAATTTGAACGGAACCTTGGGTTATGATGGATGGTGGAG  
601 CAAGTTTCATACCCGCTGAAACCAATGGTTGAAAACGCGCAGCCAACACTGAGGCAAATTTATGACACACTTCAGT  
602 GACCTGGCTGAAGCGTATATTGAGATGAGGAATAGGGAGCGACCATACATGCCTAGGTATGGTCTACAGAGAAAC  
603 ATTACAGACATGAGTTTGTACGCTATGCGTTGACTTCTATGAGCTAACTTCAAAAAACCTGTTAGAGCGAGG  
604 GAGGCGCATATGCAATGAAAGCTGCTGCGAGTACGAAACAGTGGAACTAGGTTATTTGGTCTTGATGGCAACGTG  
605 GGTACTGCAGAGGAAGACTGAACGGCACACAGCGCACGATGTGAACCGTAACATGCACACACTATTAGGGGTC  
606 CGCCAAGTATAGTTTCTGCGTGTCTTTGCTTTCCGCTTTTAAAGCTTATTGTAATATATATGAATAGCTATTACA  
607 GTGGGACTTGGTCTTGTGTTGAATGGTATCTTATATGTTTTAATATGTCTTATTAGTCTCATTACTTAGGCGAAC  
608 GACAAAGTGAGGTCACCTCGGTCTAATTTCTCTATGTAGTGCAGAAAAAAGGAAAAAAGGAAAAAAGGAAAAA  
609 AAAAAAAAAAAAAA  
610  
611 **>TEVANIb**  
612 AAAATAACAAATCTCAACACAACATATACAAAACAAACGAATCTCAAGCAATCAAGCATTCTACTTCTATTGCA  
613 CAATTTAAATCATTTCTTTTAAAGCAAAAAGCAATTTTCTGAAAATTTTACCATTACGAACGATAGCCATGGCA  
614 CTCATCTTTGGCACAGTCAACGCTAACATCCTGAAGGAAGTGTTCGGTGGAGCTCGTATGGCTTGCCTTACCAGC  
615 GCACATATGGCTGGAGCGAATGGAAGCATTGGAAGAAGGCAGAAGAACCTCTCGTGCAATCATGCACAAAACCA  
616 GTGATCTTCGGAGAAGACTACATTACCGAGGCAGACTTGCCTTACACACCACTCCATTTAGAGGTGATGCTGAA  
617 ATGGAGCGGATGATTATCTTGGTTCGTCGCGCGCTCACCCATGGCAAGAGACGCAAAGTTTCTGTGAATAACAAG  
618 AGGAACAGGAGAAGGAAAGTGGCCAAAACGTACGTGGGGCGTGAATCCATTGTTGAGAAGATTGTAGTCCCCAC  
619 ACCGAGAGAAAGGTTGATACCACAGCAGCAGTGGAAAGACATTTGCAATGAAGCTACCACTCAACTTGTGCATAAT  
620 AGTATGCCAAAGCGTAAGAAGCAGAAAACTTCTTGCCCGCCACTTCACTAAGTAACGTGTATGCCCAAACCTTGG  
621 AGCATAGTGCGCAAACGCCATATGCAGGTGGAGATCATTAGCAAGAAGAGCGTCCGAGCGAGGGTCAAGAGATTT  
622 GAGGGCTCGGTGCAATTTGTCGCAAGTGTGCGTCACATGTATGGCGAGAGGAAAAGGGTGGACTTACGTATTGAC  
623 AACTGGCAGCAAGAGACACTTCTAGACCTTGTAAAAGATTTAAGAATGAGAGAGTGGATCAATCGAAGCTCACT  
624 TTTGGTTCAAAGTGGCCTAGTTTTGAGGCAAGGCTCGTACGGACCTGCGCATTGGTATCGACATGGTATGTTCAAT  
625 GTACGCGGTGCGTGGATGGGATGTTGGTGGATGCTCGTGCAGGTAACGTTGCTGTTTGTCACTCAATGACA  
626 CATTAGCGCAAAATCAATCTCTGAGGCATTCTTACATACCATACTCTAAGAAATCTTGGAGTTGAGCCAGAT

627 GGAATCTCCCATGAGTGTACAAGAGGAGTATCAGTTGAGCGGTGCGGTGAGGTGGCTGCAATCCTGACACAAGCA  
628 CTTTCACCGTGTGGTAAGATCACATGCAAACGTTGCATGGTTGAAACACCTGACATTGTTGAGGGTGAGTCGGGA  
629 GACAGTGTACCAACCAAGGTAAGCTCCTAGCAATGCTGAAAAGAACAGTATCCAGATTTCCCAATGGCCGAGAAA  
630 CTACTCACAAGGTTTTTGAACAGAAATCACTAGTAAATACAAATTTGACAGCCTGCGTGAGCGTCAAACAACCTC  
631 ATTGGTGACCGCAAACAAGCTCCATTCACACACGTAAGTGGCTGTGAGCGAAATTTCTGTTTAAAGGCAATAAACTA  
632 ACAGGGGCGGATCTCGAAGAGGCAAGCACACATATGCTTGAATAGCAAGGTTCTTGAACAATCGCACTGAAAAAT  
633 ATGCGCATTGGCCACCTTGGTTCTTTAGAAATAAAATCTCATCGAAGGCCATGTGAATAACGCACCTCATGTGT  
634 GATAATCAACTTGATCAGAATGGGAATTTTATTTGGGGACTAAGGGGTGCACACGCAAAGAGGTTTCTTAAAGGA  
635 TTTTTCACTGAGATTGACCCAAATGAAGGATACGATAAGTATGTTATCAGGAAACATATCAGGGGTAGCAGAAA  
636 CTAGCAATTGGCAATTTGATAATGTCAACTGACTTCCAGACGCTCAGGCAACAAATTCAGGGCAAACTATTGAG  
637 CGTAAAGAAATTGGGAATCACTGCATTTCAATGCGGAATGGTAATTACGTGTACCCATGTTGTTGTTACTCTT  
638 GAAGATGGTAAGGCTCAATATTCGGATCTAAAGCATCCAACGAAGAGACATCTGGTCATTGGCAACTCTGGCGAT  
639 TCAAAGTACCTAGACCTTCCAGTTCTCAATGAAGAGAAAATGTATATAGCTAATGAAGGTTATTGCTACATGAAC  
640 ATTTTCTTTGCTCTACTAGTGAATGTCAAGGAAGAGGATGCAAAGGACTTCACCAAGTTTATAAGGGACACAATT  
641 GTTCCAAAGCTTGGAGCGTGGCCAACAATGCAAGATGTTGCAACTGCATGCTACTTACTTTCCATTCTTTACCCA  
642 GATGTCCTGAGTGTGAATTACCCAGAATTTTGGTTGATCATGACAACAAAACAATGCATGTTTTGGATTCTGAT  
643 GGGTCTAGAACGACAGGATACCACATGTTGAAAATGAACACAACATCCAGCTAATTGAATTCGTTCAATCAGGT  
644 TTGGAATCCGAAATGAAAACCTTACAATGTTGGAGGATGAACCGAGATATGGTCACACAAGGTGCAATTGAGATG  
645 TTGATCAAGTCCATATACAAACCACATCTCATGAAGCAGTTACTTGGAGGAGGCCATACATAAATGTCTGGCA  
646 ATAGTCTCCCCTTCAATTTTAATTGCCATGTACAACCTCTGGAACTTTTGAGCAGGCGTTACAAATGTGGTTGCCA  
647 AATACAATGAGGTTAGCTAACCTCGCTGCCATCTTGTGAGCCTTGGCGCAAAAGTTAACTTTGGCAGACTTGTTC  
648 GTCCAGCAGCGTAATTTGATTAATGAGTATGCGCAGGTAATTTTGGACAATCTGATTGACGGTGTGAGGGTTAAC  
649 CATTTCGCTATCCCTAGCAATGGAAATTTGTTACTATTAAGCTGGCCACCCAAGAGATGGACATGGCGTTGAGGGAA  
650 GGTGGCTATGCTGTGACCTCTGAAAAGGTGCATGAAATGTTGGAAAAAACTATGTAAGGCTTTGAAGGATGCA  
651 TGGGACGAATTAACCTTGGTTGGAAAAATTTCTCCGCAATCAGGCATTCAAGAAAAGCTCTTGAATTTGGGCGAAA  
652 CTTTAAATCATAAAAAACCCGTAGATTGCGGCGGATATAGACTTGTCTGTGAAATCGCTTTTCAAGTTCCAC  
653 TTGGAACCTCTGAAGGGAACCATCTCAAGACCGTAATGTTGGTGCAGAAAGGTAAGAGTAGCGAAGAATGCC  
654 ATGACAAAAGGGTTTTTCTCAAAATCTACAGCATGCTTCTGAGCTTACAAGTTTATCACAGTCTCGAGTGT  
655 CTTTTCTTGTGTTGACATTCTTATTTCAAATGACTGCATGATAAGGGCACACCGGAGGCGAAGGTTGCTGCA  
656 CAGTTGCAGAAAGAGAGCGAGTGGGACAATATCATCAATAGAATTTTCCAGTATTCTAAGCTTGAAAACTCTATT  
657 GGCTATCGCTCTACAGCGGAGGAAAAGACTCCAATCAGAACACCCCGAGGCTTTTCGAGTACTACAAGTTTTGCATT  
658 GGAAAGGAAGACCTCGTTGAACAAGGCAAACAACCGGAGATAGCATACTTTGAAAAGATTATAGCTTTTCATCACA  
659 CTTGTATTAATGGCTTTTTCAGCTGAGCGGAGTGTGAGTGTTCAGATACTCAATAAGTTCAAAGGAATACTG  
660 AGCTCAACGGAGAGGAGATCATCTACACGCAAGTTTGGATGATTACGTTACAACCTTTGATGACAATATGACA  
661 ATCAACCTCGAGTTGAATATGGATGAACTCCACAAGACGAGCCTTCTGAGTCACTTTTAAGCAATGTTGGAAC  
662 AACCAATCAGCCGAGGCAACGTGAAGCCACATTATAGAAGTGGGGGCACTTCATGGAGTTTACCAGAGATACT  
663 GCGGCATCGGTTGCCAGCGAGATATCACACTACCCGCAAGAGATTTTCTTGTGAGAGGTGCTGTTGGATCTGGA  
664 AAATCCACAGGACTTCCATACCATTTATCAAAGAGAGGGGAGAGTGTAAATGCTTGGAGCTTACCAGACCACTACA  
665 GATAACGTGCACAAGCAACTGAGAAGTGAACCATTTAACTGCTTCCCAACTTTGAGGATGAGAGGGGAAGTCAACT  
666 TTTGGGTATCACCGATTACAGTCATGACTAGTGGATTTCGCTTTACACCATTTTGCACGAAACATAGCTGAGGTA  
667 AAAACATACGATTTTGTGATAATTGATGAATGTGATGTTGATGCTTCTGCTATAGCGTTTAGGAATCTACTG  
668 TTTGAACATGAATTTGAAGGAAAAGTCTCAAAGTGTGAGCCACACCAGGTAGAGAAGTTGAATTCACAAC  
669 CAGTTTCCCGTGAACATCAAGATAGAAGAGGCTCTTAGCTTTTAGGAAATTTGTAAGTTTACAAGGGACAGGTGCC  
670 AACGCCAGTGTGATTAGTTGTTGGCGACAACTACTAGTATTTGTTGCTAGCTACAATGATGTTGATGACTCTTGGC  
671 AAGCTCCTTGTGCAAAAAGGATACAAAGTGTGCAAGATTGATGGAAGAACAATGAAGAGTGGAGGAACGAAATA  
672 ATCACTGAAGGTAAGTTCAGTGAAGAAAGCATTTTCATAGTCGCAACTAATATTATTGAGAATGGTGTAACCATGAC  
673 ATTGATGTAGTTGTGGATTTTGGGACTAAGGTTGTACCAGTTTGGATGTGGACAATAGAGCGGTGCAGTACAAC  
674 AAAACTGTGGTGAGTTATGGGGAGCGCATCCAAAGACTCGGTAGAGTTGGGCGACACAAGGAAGGAGTAGCACTT  
675 CGAATTGGCCAAACAATAAAACACTGGTTGAAATTTCCAGAAATGGTTGCCACTGAAGCTGCCTTTCTATGCTTC  
676 ATGTACAATTTGCCAGTGACAACACAGAGTGTTCACACACTGCTGAAAATGCCACATTTATACAAGCTAGA  
677 ACTATGGCACAGTTTGGAGCTATCATATTTTACACAATTAATTTTGTGCGATTTGATGGTAGTATGCATCCAGTC  
678 ATACATGACAAGCTGAAGCGCTTTAAGCTACACACTTGTGAGACATTCCTCAATAAGTTGGCGATCCCAAATAAA  
679 GGCTTATCCTCTTGGCTTACGAGTGGAGAGTATAAGCGACTTGGTTACATAGCAGAGGATGCTGGCATAAGAATC  
680 CCATTTCGTGTGCAAAGAAATTCAGACTCCTTGCATGAGGAAATTTGGCACATTGTAGTCGCCCATAAAGGTGAC  
681 TCGGGTATTGGGAGGCTCACTAGCGTACAGGCAGCAAAGGTTGTTTATACTCTGCAAACGGATGTGCACTCAATT  
682 GCGAGGACTCTAGCATGCATCAATAGACTCATAGCACATGAACAAATGAAGCAGAGTCATTTTGAAGCCGCAACT  
683 GGGAGAGCATTTTCTTCCAAATTAATCAATAACAAGCATATTTGACACGCTGAAAAGCAAAATATGCTACAAA  
684 CATAAGAAAGAAAATATTGCAAGTGTTCAGCAGGCAAAAGATCAATTTGCTAGAGTTTTCGAACCTAGCAAAGGAT  
685 CAAGATGTCACGGGTATCATCCAAGACTTCAATCACCTGGAAACTATCTATCTCAATCAGATAGCGAAGTGGCT  
686 AAGCATCTGAAGCTTAAAAGTCACTGGAATAAAAGCCAAATCACTAGGGACATCATAATAGCTTTGCTGTGTTA  
687 ATTGGTGGTGGATGGATGCTTGAACGTAAGTCAAGGACAAGTTCAATGAACCAGTCTATTTCCAGGGAAGAAG



688 AATCAGAAGCACAAAGCTTAAGATGAGAGAGGGCGCGTGGGGCTAGAGGGCAATATGAGGTTGCAGCGGAGCCAGAG  
689 GCGCTAGAACATTACTTTGGAAGCGCATATAATAACAAAGGAAAGCGCAAGGGCACCACGAGAGGAATGGGTGCA  
690 AAGTCTCGGAAATTCATAAACATGTATGGGTTTGGATCCAACTGATTTTTTCATACATTAGGTTTGTGGATCCATTG  
691 ACAGGTCACACTATTGATGAGTCCACAAACGCACCTATTGATTTAGTGCAGCATGAGTTTGGAAAGGTTAGAACA  
692 CGCATGTTAATTGACGATGAGATAGAGCCTCAAAGTCTTAGCACCCACACCACAATCCATGCTTATTTGGTGAAT  
693 AGTGGCACGAAGAAAGTTCTTAAGGTTGATTTAACACCACACTCGTTCGCTACGTGCGAGTGAAGAAATCAACAGCA  
694 ATAATGGGATTTCTGAAAGGGAGAATGAATTGCGTCAAACCGGCATGGCAGTGCAGTGGCTTATGATCAATTG  
695 CCACCAAAGAGTGAGGACTTGACGTTTGAAGGAGAAAGCTTGTTTAAGGGACCACGTGATTACAACCCGATATCG  
696 AGCACCATTTGTCACTTGACGAATGATCTGATGGGCACACAACATCGTTGTATGGTATTGGATTTGGTCCCTTC  
697 ATCATTACAAACAAGCACTTTGTTTAGAAGAATAATGGAACACTGTTGGTCCAATCACTACATGGTGTATTCAAG  
698 GTCAAGAACCACGACTTTGCAACAACACCTCATTGATGGGAGGGACATGATAATTATTTCGCATGCCTAAGGAT  
699 TTCCACCATTCTCAAAGCTGAAATTTAGAGAGCCACAAAGGGAAGAGCGCATATGTCTTGTGACAACCAAC  
700 TTCCAAACTAAGAGCATGTCTAGCATGGTGTGACACTAGTTGCACATTTCCCTTCATCTGATGGCATTCTCTGG  
701 AAGCATTGGATTCAAACCAAGGATGGGCAGTGTGGCAGTCCATTAGTATCAACTAGAGATGGGTTTCAATTGTTGGT  
702 ATACACTCAGCATCGAATTTACCAACACAAACAATTATTTACAAGCGTGGCGAAAACTTCATGGAATTGTTG  
703 ACAAATCAGGAGGCGCAGCAGTGGGTTAGTGGTTGGCGATTAATGCTGACTCAGTATTGTGGGGGGCCATAAA  
704 GTTTTCATGAGCAAACCTGAAGAGCCTTTTCAGCCAGTTAAGGAAGCGACTCAACTCATGAGTGAATTGGTGTAC  
705 TCGCAAGTGGCACTGTGGGTGCTGGTGTGACGCTGGTAAGAAGAAAGATCAAAGGATGATAAAGTCGCTGAG  
706 CAGGCTTCAAAGGATAGGGATGTTAATGCTGGAACCTCAGGAACATTCTCAGTTCACGAATAAATGCTATGGCC  
707 ACAAACCTTCAATATCCAAGGATGAGGGGAGAGGTGGTTGTAAACTTGAATCACCTTTTAGGATACAAGCCACAG  
708 CAAATTGATTTGTCAAATGCTCGAGCCACACATGAGCAGTTTGGCCGCTGGCATTGAGGAGTGTGACAGCCTAT  
709 GGAGTGAATGAAGAGCAAATGAAAATATTGCTAAATGGATTTATGGTGTGGTGCATAGAAAAATGGGACTTCCCCA  
710 AATTTGAACGGAACCTGGGTTATGATGGATGGTGGAGGCAAGTTTCATACCCGCTGAAACCAATGGTTGAAAAAC  
711 GCGCAGCCAACACTGAGGCAAATATGACACACTTCAGTGACCTGGCTGAAGCGTATATTGAGATGAGGAATAGG  
712 GAGCGACCATAACATGCCTAGGTATGGTCTACAGAGAAACATTACAGACATGAGTTTGTACGCTATGCGTTGAC  
713 TTCTATGAGCTAACTCAAACCAACCTGTAGAGCAGGGAGGCGCATATGCAAATGAAAGCTGCTGCAGTACGA  
714 AACATGGAACTAGGTTATTTGGTCTTGTAGGCAACGTTGGTACTGCAGAGGAAGACACTGAACCGCACAGCG  
715 CACGATGTGAACCGTAACATGCACACACTATTAGGGGTCCGCCAGTGATAGTTTCTGCGTGTCTTTGCTTTCCGC  
716 TTTTAAGCTTATTGTAATATATATGAATAGCTATTACAGTGGGACTTGGTCTTGTGTTGAATGGTATCTTATAT  
717 GTTTTAATATGTCTTATTAGTCTCATTACTTAGGCGAACGACAAAGTGAGGTACCTCGGTCTAATTTCTCCTATG  
718 TAGTGCGAGAAAAA  
719

720 >TEVΔIb::crtB (insert between positions 6981-6982 of TEVΔIb)

721 GGGGAGAAGATGAATAATCCGTCGTTACTCAATCATGCGGTGAAACGATGGCAGTTGGCTCGAAAAGTTTTGCG  
722 ACAGCCTCAAAGTTATTTGATGCAAAAACCCGGCGCAGCGTACTGATGCTCTACGCCTGGTGCCGCCATTGTGAC  
723 GATGTTATTGACGATCAGACGCTGGGCTTTTCAGGCCCCGCGCAGCCTGCCTTACAAACGCCCCGAACAACGTCGTGATG  
724 CAACTTGAGATGAAAACGCGCCAGGCCTATGCAGGATCGCAGATGCACGAACCGGCGTTTTCAGGAA  
725 GTGGCTATGGCTCATGATATCGCCCCGGCTTACGCGTTTGGATCATCTGGAAGGCTTCGCCATGGATGTACGCGAA  
726 GCGCAATACAGCCAACCTGGATGATACGCTGCGCTATTGCTATCACGTTGCAGGCGTTGTGCGGCTTGATGATGGCG  
727 CAAATCATGGGCGTGCAGGATAACGCCACGCTGGACCGCGCTGTGACCTTGGGCTGGCATTTTCAGTTGACCAAT  
728 ATTGCTCGCGATATTGTGGACGATGCGCATGCGGGCCGCTGTTATCTGCCGCAAGCTGGCTGGAGCATGAAGGT  
729 CTGAACAAAGAGAATTATGCGGCACCTGAAAACCGTCAGGCGCTGAGCCGTATCGCCCGTCTGTTGGTGCAGGAA  
730 GCAGAACCTTACTATTGTCTGCCACCGGCTGGCAGGTTGCCCTGCGTTCCGCTGGGCAATCGCTACG  
731 GCGAAGCAGGTTTACCGGAAAATAGGTGTCAAAGTTGAACAGGTCAGCCGCTCAGCAAGCCTGGGATCAGCGGCAGTCA  
732 ACGACCAGCCCCGAAAATAACGCTGCTGCTGGCCGCTTGGTTCAGGCCCCCTTACTTCCCGGATGCGGGCTCAT  
733 CCTCCCCGCCCTGCGCATCTCTGGCAGCGCCCCGCTCACGACTGAGAATCTTTATTTTCAG

735 >TEVΔIb::LbCas12a (insert between positions 6981-6982 of TEVΔIb)

736 GATGAGCAAGCTGGAGAAGTTTACAACTGCTACTCCCTGTCTAAGACCCTGAGGTTCAAGGCCATC  
737 CCTGTGGGCAAGACCCAGGAGAATCGACAATAAGCGGCTGCTGGTGGAGGACGAGAAGAGAGCCGAGGATAT  
738 AAGGGCGTGAAGAAGCTGCTGGATCGCTACTATCTGTCTTTTATCAACGACGTGCTGCACAGCATCAAGCTGAAG  
739 AATCTGAACAATTACATCAGCCTGTTCCGGAAGAAAACCGAGAAGGAGAATAAGGAGCTGGAGAACCTG  
740 GAGATCAATCTGCGGAAGGAGATCGCCAAGGCCTTCAAGGGCAACGAGGGCTACAAGTCCCTGTTTAAAGAGGAT  
741 ATCATCGAGACAATCTGCCAGAGTTCTGGACGATAAGGACGAGATCGCCCTGGTGAACAGCTTCAATGGCTTT  
742 ACCACAGCCTTACCAGGCTTCTTTGATAACAGAGAGAATATGTTTTCCGAGGAGGCCAAGAGCACATCCATCGCC  
743 TTCAGGTGTATCAACGAGAATCTGACCCGCTACATCTCTAATATGGACATCTTCGAGAAGGTGGACGCCATCTTT  
744 GATAAGCACGAGGTGCAGGAGATCAAGGAGAAGATCCTGAACAGCGACTATGATGTGGAGGATTTCTTTGAGGGC  
745 GAGTTCTTTAACTTTGTGCTGACACAGGAGGGCATCGACGTGTATAACGCCATCATCGGCGGCTTCGTGACCGAG  
746 AGCGGCGAGAAGATCAAGGGCCTGAACGAGTACATCAACCTGTATAATCAGAAAACCAAGCAGAAGCTGCCTAAG  
747 TTTAAGCCACTGTATAAGCAGGTGCTGAGCGATCGGGAGTCTCTGAGCTTCTACGGCGAGGGCTATACATCCGAT  
748 GAGGAGGTGCTGGAGGTGTTTAGAAACACCCTGAACAAGAAGCAGGAGATCTTACGCTCCATCAAGAAGCTGGAG

```
749 AAGCTGTTCAAGAATTTTGCAGGACTCTAGCGCCGGCATCTTTGTGAAGAACGGCCCCGCCATCAGCACAAATC
750 TCCAAGGATATCTTCGGCGAGTGGAACGTGATCCGGGACAAGTGAATGCCGAGTATGACGATATCCACCTGAAG
751 AAGAAGGCCGTGGTGACCGAGAAGTACGAGGACGATCGGAGAAAGTCCCTTCAAGAAGATCGGCTCCTTTTCTCTG
752 GAGCAGCTGCAGGAGTACGCCGACGCCGATCTGTCTGTGGTGGAGAAGCTGAAGGAGATCATCATCCAGAAGGTG
753 GATGAGATCTACAAGGTGTATGGCTCCTCTGAGAAGCTGTTTCGACGCCGATTTTGTGCTGGAGAAGAGCCTGAAG
754 AAGAACGACGCCGTGGTGGCCATCATGAAGGACCTGCTGGATTCTGTGAAGAGCTTCGAGAATTACATCAAGGCC
755 TTCTTTGGCGAGGGCAAGGAGACAAACAGGGACGAGTCTTCTATGGCGATTTTGTGCTGGCCTACGACATCCTG
756 CTGAAGGTGGACCACATCTACGATGCCATCCGCAATTATGTGACCCAGAAGCCCTACTCTAAGGATAAGTTCAAG
757 CTGTATTTTTCAGAACCCTCAGTTTATGGCGGCTGGGACAAGGATAAGGAGACAGACTATCGGGCCACCATCCTG
758 AGATACGGCTCCAAGTACTATCTGGCCATCATGGATAAGAAGTACGCCAAGTGCTGCAGAAGATCGACAAGGAC
759 GATGTGAACGGCAATTACGAGAAGATCAACTATAAGCTGCTGCCCGCCCTAATAAGATGCTGCCAAAGGTGTTT
760 TTTTCTAAGAAGTGGATGGCCTACTATAACCCAGCGAGGACATCCAGAAGATCTACAAGAATGGCACATTTCAAG
761 AAGGGCGATATGTTTAACTGAATGACTGTCAAGCTGATCGACTTCTTTAAGGATAGCATCTCCCGGTATCCA
762 AAGTGGTCCAATGCCTACGATTTCAACTTTTCTGAGACAGAGAAGTATAAGGACATCGCCGGCTTTTACAGAGAG
763 GTGGAGGAGCAGGGCTATAAGGTGAGCTTCGAGTCTGCCAGCAAGAAGGAGGTGGATAAGCTGGTGGAGGAGGGC
764 AAGCTGTATATGTTCCAGATCTATAACAAGGACTTTTCCGATAAGTCTCACGGCACACCCAATCTGCACACCATG
765 TACTTCAAGCTGCTGTTTGCAGGACAATCACGGACAGATCAGGCTGAGCGGAGGAGCAGAGCTGTTTATGAGG
766 CGCGCCTCCCTGAAGAAGGAGGAGCTGGTGGTGCACCCAGCCAACCTCCCTATCGCCAACAAGAATCCAGATAAT
767 CCCAAGAAAACCACAACCCTGTCTACGACGTGTATAAGGATAAGAGGTTTTCTGAGGACCAGTACGAGCTGCAC
768 ATCCCAATCGCCATCAATAAGTGCCTCAAGAACATCTTCAAGATCAATACAGAGGTGCGCGTGTCTGAAGCAC
769 GACGATAACCCCTATGTGATCGGCATCGATAGGGGCGAGCGCAATCTGCTGTATATCGTGGTGGTGGACGGCAAG
770 GGCAACATCGTGGAGCAGTATTCCTGAACGAGATCATCAACAACCTTCAACGGCATCAGGATCAAGACAGATTAC
771 CACTCTCTGCTGGACAAGAAGGAGAAGGAGAGGTTTCGAGGCCCGCCAGAACTGGACCTCCATCGAGAATATCAAG
772 GAGCTGAAGGCCGGCTATATCTCTCAGGTGGTGCACAAGATCTGCGAGCTGGTGGAGAAGTACGATGCCGTGATC
773 GCCCTGGAGACCTGAACCTCTGGCTTTAAGAATAGCCCGTGAAGGTGGAGAAGCAGGTGTATCAGAAGTTTCGAG
774 AAGTGTGATCGATAAGCTGAACATGTTGAGACATGGTGGACAAGAAGTCTAATCTTGTGCAACAGCGCGCTGAAG
775 GGCTATCAGATCACCAATAAGTTTCGAGAGCTTTAAGTCCATGTCTACCCAGAACGGCTTCACTTTTACATCCCT
776 GCCTGGCTGCATCCAAGATCGATCCATCTACCGCTTTGTGAACCTGCTGAAAACCAAGTATACCAGCATCGCC
777 GATTCCAAGAAGTTCATCAGCTCCTTTGACAGGATCATGTACGTGCCCGAGGAGGATCTGTTTCGAGTTTGCCCTG
778 GACTATAAGAACTTCTCTCGCACAGACGCCGATTACATCAAGAAGTGAAGCTGTACTCTACGGCAACCCGGATC
779 AGAATCTTCCGGAATCCTAAGAAGAACAACGTGTTTCGACTGGGAGGAGGTGTGCTGACCAGCGCTATAAGGAG
780 CTGTTCAACAAGTACGGCATCAATTATCAGCAGGGCGATATCAGAGCCCTGCTGTGCGAGCAGTCCGACAAGGCC
781 TTCTACTCTAGCTTTATGGCCCTGATGAGCCTGATGCTGCAGATGCGGAACAGCATCACAGGCCGACCGACGTG
782 GATTTTCTGATCAGCCCTGTGAAGAACTCCGACGGCATCTTCTACGATAGCCGAACTATGAGGCCAGGAGAAT
783 GCCATCCTGCCAAGAACGCCGACGCCAATGGCGCTATAACATCGCCAGAAAGGTGCTGTGGCCATCGGCCAG
784 TTCAAGAAGGCCGAGGACGAGAAGCTGGATAAGGTGAAGATCGCCATCTCTAACAAGGAGTGCTGGAGTACGCC
785 CAGACCAGCGTGAAGCACAAAAGCCGGCCGACGAAAAGGCCGGCCAGGCAAAAAGAAAAGGGATCCTAC
786 CCATACGATGTTCCAGATTACGCTTATCCCTACGACGTGCCTGATTATGCATACCCATATGATGTCCCGACTAT
787 GCCACGACTGAGAATCTTTATTTTCAG
```

788  
789 **Figure S2.** Full sequence of wild-type potato virus X (PVX; GenBank accession number  
790 MT799816) and its derived recombinant viruses PVX::crFT and PVX::Nib:crFT. In  
791 recombinant PVX clones, heterologous sequences are transcribed from coat protein (CP)  
792 promoter and a deleted version of PVX CP, lacking the 29 initial codons, is transcribed from  
793 an heterologous promoter derived from *Bamboo mosaic virus* (BaMV) CP (Dickmeis et al.,  
794 2014). **PVX CP promoter** with a ATG-AGG mutation to abolish start codon is underlined.  
795 **BaMV CP promoter** is in blue. crRNA sequences corresponding to **NbFT** and **NbXT1** are on  
796 pink and red background, respectively, and **protospacer** region is underlined (dotted). cDNA  
797 corresponding to **TEV nuclear inclusion b (Nib) cistron** is on dark blue background.

798  
799 **>PVX (MT799816)**

```
800 GAAAACATAACCACCAACACAACCAACCCACCACGCCCAATTGTTACACACCCGCTTGAAAAAGAAA
801 GTTTAACAATGGCCAAGGTGCGCGAGGTTTACCAATCTTTTACAGACTCCACCACAAAACCTCATCCAAGAT
802 GAGGCTTATAGAAACATTCGCCCCATCATGGAAAAACACAACTAGCTAACCCCTACGCTCAAACGGTTGAAGCG
803 GCTAATGATCTAGAGGGGTTTCGGCATAGCCACCAATCCCTATAGCATTGAATTGCATACACATGCAGCCGCTAAG
804 ACCATAGAGAATAAACTTCTAGAGGTGCTTGGTTCATCCTACCACAAGAACCTGTTACATTTATGTTTCTTAAA
805 CCCAGAAAGCTAACTACATGAGAAGAAACCCGCGGATCAAGGACATTTTCCAAAATGTTGCCATTGAACCAAGA
806 GACGTAGCCAGGTACCCCAAGGAAACAATAATTGACAACTCACAGAGATCACAAACGGAAAACAGCATACATTAGT
807 GACACTCTGCACTTCTTGGATCCGAGCTACATAGTGGAGACATTTCAAAAACCTGCCAAAATTGCAAAACATTTGAT
```

808 GCGACCTTAGTTCTCCCCGTTGAGGCAGCCTTTAAAATGGAAAGCACTCACCCGAACATATACAGCCTCAAATAC  
809 TTCGGAGATGGTTTTCCAGTATATACCAGGCAACCATGGTGGCGGGGCATACCATCATGAATTCGCTCATCTACAA  
810 TGGCTCAAAGTGGGAAAGATCAAGTGGAGGGACCCCAAGGATAGCTTTCTCGGACATCTCAATTACACGACTGAG  
811 CAGGTTGAGATGCACACAGTGACAGTACAGTTGCAGGAATCGTTTCGCGGCAAACCACTTGTACTGCATCAGGAGA  
812 GGAGACTTGCTCACACCGGAGGTGCGCACTTTTCGGCCAACCTGACAGGTACGTGATTCCACCACAGATCTTCCTC  
813 CCAAAAGTTCACAACCTGCAAGAAGCCGATTCTCAAGAAAATATGATGCAGCTCTTCTTGTATGTTAGGACAGTC  
814 AAGGTCGCAAAAAATTGTGACATTTTTGCCAAAGTCAGACAATTAATTAATCATCTGACTTGGACAAATACTCT  
815 GCTGTGGAACCTGGTTTTACTTAGTAAGCTACATGGAGTTCCTTGCCGATTTACAAGCTACCACCTGCTTCTCAGAC  
816 ACACTTTCTGGTGGCTTGCTAACAAAGACCCTTGACCCGGTGAGGGCTTGGATAACAAGAAAAAGATGCAGCTG  
817 TTTGGTCTTGAGGACTACGCGAAGTTAGTCAAAGCAGTTGATTTCCACCCTGGATTTTTCTTCAAAGTGGAA  
818 ACTTGGGACTTCAGATTCCACCCTTGCAAGCGTGGAAAGCCTTCCGACCAAGGGAAGTGTGCGATGTAGAGGAA  
819 ATGGAAAGTTTGTCTCAGATGGGGACTTGCTTGATTGCTTCACAAGAATGCCAGCTTATGCGGTAAACGCAGAG  
820 GAAGATTTAGCTGCAATCAGGAAAACGCCCAGATGGATGTCGGTCAAGAAAGTTAAAAGAACCTGCAGGAGACAGA  
821 AATCAATACTCAAACCCTGCAGAACTTTCTCAACAAGCTCCACAGGAAAACACAGTAGGGAGGTGAAAACACCAG  
822 GCCGCAAAGAAAGCTAAACGCCTAGCTGAAATCCAGGAGTCAATGAGAGCTGAAGGTGATGCCGAACCAAATGAA  
823 ATAAGCGGGGGCATGGGGCAATACCCAGCAACGCCGAACCTTCTGGCAGCAATGATGCCAGACAAGAACTCACA  
824 CTCCCAACCCTAAACCTGTCCCTGCAAGGTGGGAAGATGCTTCATTCACAGATTCTAGTGTGGAAGAGGAGCAG  
825 GTTAAACCCCTTGGAAAAGAAACCGTTGAAACAGCGACGCAACAAGTCATCGAAGGACTTCTTGGAAACACTGG  
826 ATTCCTCAATTAATGCTGTTGGATTCAAGGCGCTGGAAATTCAGAGGGATAGGAGTGAACAATGATCATGCC  
827 ATCAGAGAAATGGTCTCCGGGCTGGAAAAGAGGACTTCCCTGAAGGAACTCCAAAAGAGTTGGCAGGAGAAATG  
828 TTCGCTATGAACAGAAGCCCTGCCACCATCCCTTTGGACCTGCTTAGAGCCAGAGACTACGGCAGTGATGTAAG  
829 AACAAAGAAATGGTGCCATCACAAGACACAGGCAACGAGTTGGGGCGAATACTTGACAGGAAAAGATAGAAAAGC  
830 TTGACTGAGAGGAAAGTTGCGACTTGTGTCAATTCATGGAGCTGGAGGTCTTGGAAAAAGTCATGCCATCCAGAAG  
831 GCATTGAGAGAAATGGCAAGGGCTCGGACATCACTGTAGTCTTCCGACCAATGAACTGCGGCTAGATTGGAGT  
832 AAGAAAGTGCCTAACACTGAGCCCTATATGTTCAAGACCTATGAAAAGGCGTTAATTTGGGGGAACAGGCAGCATA  
833 GTCATCTTTGACGATTACTCAAACCTTCTCCCGGTTACATAGAAAGCCTTAGTCTGTTTCTACTCTAAAATCAAG  
834 CTAATCTTCTAACAGGAGATAGCAGACAAGCGTCTACCATGAAACTGCTGAGGACGCCCTCATCAGGCAATTTG  
835 GGACCAGCAACAGAGTACTTCTCAAAAATACTGCCGATACTATCTCAATGCCACACACCCTCAACAAGAAAGATCTT  
836 GCGAACATGCTTGGTGTCTACAGTGAGAGAACGGGAGTCACCGAAATCAGCATGAGCGCCGAGTTCTTAGAAGGA  
837 ATCCCAACTTTGGTACCCTCGGATGAGAAGAGAAAGCTGTACATGGGCACCGGGAGGAATGACACGTTACATAC  
838 GCTGGATGCCAGGGGCTAACTAAGCCGAAGGTACAAATAGTGTGGACCACAACACCCCAAGTGTGTAGCGCGAAT  
839 GTGATGTACACGGCACTTTCTAGAGCCACCGATAGGATCACTTCGTGAACACAAGTGCAAAATCTCTCGGCCCTC  
840 TGGGAAAAGTTGGACAGCACCCCTTACCTCAAGACTTTCTATCAGTGGTGAGAGAACAAGCACTCAGGGAGTAC  
841 GAGCCGGCAGAGGCAGAGCCAATTCAGAGCCTGAGCCCCAGACACACATGTGTGTCGAGAATGAGGAGTCCGTG  
842 CTAGAAGAGTACAAAGAGGAACCTTTGGAAAAGTTTGCAGAGAGATCCACTCTGAATCCCATGGTCAATCAAC  
843 TGTGTCAAACCTGAAGACACAACCATTCAAGTGTGTTTTCGCATCAACAAGCAAAAAGATGAGACCCCTCTCTGGGCG  
844 ACTATAGATGCGCGGCTCAAGACCAGCAATCAAGAGACAACTTCCGAGAATTCCTGAGCAAGAAGGACATTTGGG  
845 GACGTTCTGTTTTTAAACTACCAAAAAGCTATGGGTTTTACCCAAAAGAGCGTATTCTTTTTTCCCAAGAGGTCTGG  
846 GAAGCTTGTGCCACGAAGTACAAAGCAAGTACCTCAGCAAGTCAAAGTGCAACTTGATCAATGGGACTGTGAGA  
847 CAGAGCCCAGACTTCGATGAAAATAAGATTATGGTATTCTCAAGTCGAGTGGGTCAAAAAGTTGAAAAACTA  
848 GGTCTACCCAAGATTAAGCCAGGTCAAACCATAGCAGCCTTTTACCAGCAGACTGTGATGCTTTTTTGGAACTATG  
849 GCTAGGTACATGCGATGGTTTCAGACAGGCTTTCCAGCCAAAAGAAGTCTTCATAAACTGTGAGACCACGCCAGAT  
850 GACATGTCTGCATGGGCCTTGAACAACCTGGAATTTGACAGACCTAGCTTGGCTAATGACTACACAGCTTTTCGAC  
851 CAGTCTCAGGATGGGCCATGTTGCAATTTGAGGTTGCTCAAAGCCAAACACCCTGCATACCAGAGGAAATCAT  
852 CAGGCATACATAGATATTAAGACTAATGCACAGATTTTCTTAGCCAGTATCAATATGCGCCCTGACTGGTGTAA  
853 GGTCCCACTTTTTGATGCAAACTGAGTGCAACATAGCTTACACCATAAAAAGTTTGGATCCCAGCCGGAACCT  
854 GCTCAAGTTTTATGCAGGAGACGACTCCGCACTGGACTGTGTTCCAGAAGTGAAGCATAGTTTTCCACAGGCTTGAG  
855 GACAAATTACTCCTAAAGTCAAAGCCTGTAATCACGCAGCAAAAAGAAGGGCAGTTGGCCTGAGTTTTGTGGTTGG  
856 CTGATCACACCAAAAAGGGTGTGAAAGACCAATTAAGCTCCATGTTAGCTTAAAATTTGGCTGAAGCTAAGGGT  
857 GAACTCAAGAAATGTCAAGATTCTATGAAATGATCTGAGTTATGCCTATGACCACAAGGACTCTCTGCATGAC  
858 TTGTTCCGATGAGAAACAGTGTGAGGCACACACACTCACTTGCAGAACACTAATCAAGTCAGGGAGAGGCACTGTC  
859 TCACTTTCCCGCCTCAGAACTTTCTTTAACCGTTAAGTTACCTTAGAGATTTGAATAAGATGGATATTTCTCATC  
860 AGTAGTTTTGAAAAGTTTAGGTTATTCTAGGACTTCCAAATCTTTAGATTACAGGACCTTTGGTAGTACATGCAGTA  
861 GCCGGAGCCGGTAAGTCCACAGCCCTAAGGAAGTTGATCCTCAGACACCCAACATTCACCGTGCATACACTCGGT  
862 GTCCTGACAAGGTGAGTATCAGAACTAGAGGCATACAGAAGCCAGGACCTATTCTGAGGGCAACTTCGCAATC  
863 CTCGATGAGTATACTTTGGACAACACCACAAGGAACTCATACCAGGCACTTTTTGCTGACCCCTATCAGGCACCG  
864 GAGTTTAGCCTAGAGCCCCACTTCTACTTGGAAACATCATTTTCGAGTTCGAGGAAAAGTGGCAGATTTGATAGCT  
865 GGCTGTGGCTTCGATTTTCGAGACCAACTCACCGGAAGAAGGGCACTTAGAGATCACTGGCATAATCAAAGGGCCC  
866 CTACTCGGAAAGGTGATAGCCATTGATGAGGAGTCTGAGACAACACTGTCCAGGCATGGTGTGAGTTTGTAAAG  
867 CCCTGCCAAGTGACGGGACTTGAGTTCAAAGTAGTCACTATTGTGTCTGCCGCACCAATAGAGGAAATTTGGCCAG  
868 TCCACAGCTTTCTACAACGCTATCACCAGGTCAAAGGGATTGACATATGTCCGCGCAGGGCCATAGGCTGACCGC

```
869 TCCGGTCAATTCTGAAAAAGTGTACATAGTATTAGGTCTATCATTTTGTCTTGTAGTTTCAATTACCTTTCTGCTTTC
870 TAGAAATAGCTTACCCACGTCGGTGACAACATTCACAGCTTGCCACACGGAGGAGCTTACAGAGACGGCACCAA
871 AGCAATCTTGTACAACCTCCCAATCTAGGGTCACGAGTGAGTCTACACAACGGAAAGAACGCAGCATTGCTGC
872 CGTTTTGCTACTGACTTTGCTGATCTATGGAAGTAAATACATATCTCAACGCAATCATACTTGTGCTTGTGGTAA
873 CAATCATAGCAGTCATTAGCACTTCTTAGTGAGGACTGAACCTTGTGTCAAGATTACTGGGGAATCAATCA
874 CAGTGTGGCTTGCAAACCTAGATGCAGAAACCATAGGGCCATTGCCGATCTCAAGCCACTCTCCGTTGAACGGT
875 TAAGTTTCCATTGATACTCGAAAGATGTGAGCACCAGCTAGCACAACACAGCCCATAGGGTCAACTACCTCAACT
876 ACCACAAAAACTGCAGGCGCAACTCCTGCCACAGCTCAGGCCTGTTCACTATCCCAGGATGGGGATTTCTTTAGT
877 ACAGCCCTGCCATAGTACCCAGCAATGCTGTCGCAACAAATGAGGACCTCAGCAAGATTGAGGCTATTTGGAAG
878 GACATGAAGGTGCCACAGACACTATGGCAGGCTGCTTGGGACTTAGTCAGACACTGTGCTGATGTAGGATCA
879 TCCGCTCAAACAGAAATGATAGATACAGGTCCTATTCCAACGGCATCAGCAGAGCTAGACTGGCAGCAGCAATT
880 AAAGAGGTGTGCACACTTAGGCAATTTTGCATGAAGTATGCCCCAGTGGTATGGAACCTGGATGTTAACTAACCAAC
881 AGTCCACCTGCTAACTGGCAAGCACAAGGTTTCAAGCCTGAGCACAATTCGCTGCATTGCACTTCTTCAATGGA
882 GTCACCAACCCAGCTGCCATCATGCCAAAGAGGGGCTCATCCGGCCACCGTCTGAAGCTGAAATGAATGCTGCC
883 CAACTGCTGCCTTTGTGAAGATTACAAAGGCCAGGGCACAATCCAACGACTTTGCCAGCCTAGATGCAGCTGTC
884 ACTCGAGGTGCTATCACTGGAACAACAACCGCTGAGGCTGTTGTCACTCTACCACCACCATAACTACGCTACAT
885 AACCGACGCTACCCAGTTTCATAGTATTTTCTGGTTTGATTGTATGAATAATATAAAATAAAAAAAAAAAAAAA
886 AAAAAAAAAAAAAAAAAAAAAAAAAAAAAAAAAAAAAA
887
888 >PVX::crFT (insert between A5585 and T5737 of PVX-wt)
889 AGGGCCATTGCCGATCTCAAGCCACTCTCCGTTGAACGGTTAAGTTTCCATTGATACTCGAAAGAGGTCAGCACC
890 AGCTAGCATAATTTCTACTAAGTGTAGATCAAGATCTATTGGCCTAAGAGTTTAATTTCTACTAAGTGTAGATTA
891 GGGTTTGTTAAGTTTCCCTTTTTACTCGAAAGATG
892
893 >PVX::crXT1:crTFL1:crFT (insert between A5585 and T5737 of PVX-wt)
894 AGGGCCATTGCCGATCTCAAGCCACTCTCCGTTGAACGGTTAAGTTTCCATTGATACTCGAAAGAGGTCAGCACC
895 AGCTAGCATAATTTCTACTAAGTGTAGATTAAGTGTAGTTTGGAAATTTCTTAATTTCTACTAAGTGTAGATCA
896 AGATCTATTGGCCTAAGAGTTTAATTTCTACTAAGTGTAGATTAGGGTTTGTTAAGTTTCCCTTTTTACTCGAA
897 GATG
898
899 >PVX::Nib:crFT (insert between A5585 and T5737 of PVX-wt)
900 AGGGCCATTGCCGATCTCAAGCCACTCTCCGTTGAACGGTTAAGTTTCCATTGATACTCGAAAGAGGTCAGCACC
901 AGCTAGCATAATTTGGGGGAGAAGAGGAAATGGGTGCTGGAAGCACTGTGAGGAACTTGAAGCCAGTGGCTGAGTGTG
902 CCAGTCAGTTAGTCACAAAGCATGTGGTTAAAGGAAAGTGTCCCCTCTTTGAGCTCTACTTGCAGTTGAATCCAG
903 AAAAGGAAGCATATTTTAAACCGATGATGGGAGCATATAAGCCAAGTCGACTTAATAGAGAGGCGTTCCTCAAGG
904 ACATTCTAAAATATGCTAGTGAATTTGAGATTGGGAATGTGGATTGTGACTTGTGAGCTTGCATAAGCATGC
905 TCATCACAAGCTCAAGGCGTTAGGATTTCCCAACTGTGAACTACATCACTGACCCAGAGGAAATTTTTAGTGCAAT
906 TGAATATGAAAGCAGCTATGGGAGCACTATACAAAGGCAAGAAGAAAGAAAGCTCTCAGCGAGCTCACACTAGATG
907 AGCAGGAGGCAATGCTCAAAGCAAGTTGCCTGCGACTGTATACGGGAAAGCTGGGAATTTGGAATGGCTCATTGA
908 AAGCAGAGTTGCGTCCAATTGAGAAGGTTGAAAACAACAAAACCGGAACTTTACAGCAGCACCAATAGACACTC
909 TTCTTGCTGGTAAAGTTTGCCTGGATGATTTCAACAATCAATTTTATGATCTCAACATAAAGGCACCATGGACAG
910 TTGGTATGACTAAGTTTATCAGGGGTGGAATGCAATTGATGGAGGCTTTACCAAGTGGGTGGTGTATTGTGACG
911 CTGATGGTTGCAATTCGACAGTTCTTACTCCATTCCTCATTAATGCTGTATTGAAAGTGCAGCTTGCCTTCA
912 TGGAGGAATGGGATTTGGTGAAGCAATGCTGCGAAATTTGTACTGAGATAGTGTATACACCAATCCTCACAC
913 CGGATGGTACTATCATTAAAGAAGCATAAAGGCAACAATAGCGGGCAACCTTCAACAGTGGTGGACAACACACTCA
914 TGGTCATTATTGCAATGTTATACACATGTGAGAAGTGTGGAATCAACAAGGAAGAGATTGTGTATTACGTCAATG
915 GCGATGACCTATTGATTGCCATTACCCAGATAAAGCTGAGAGGTTGAGTGGATTCAAAGAATCTTTTCGGAGAGT
916 TGGGCCTGAAATATGAATTTGACTGCACCACCAGGGACAAGACACAGTTGTGGTTTCAATGTACACAGGGCTTTGG
917 AGAGGGATGGCATGTATATACCAAAGCTAGAAGAAGAAAGGATTGTTTCTATTTTGAATGGGACAGATCCAAAG
918 AGCCGTCACATAGGCTTGAAGCCATCTGTGCATCAATGATCGAAGCATGGGGTTATGACAAGCTGGTTGAAGAAA
919 TCCGCAATTTCTATGCATGGTTTTTGAACAAGCGCCGATTTCACAGCTTGCAGAAGAAGAAAGCGCCATATC
920 TGGCTGAGACTGCGCTTAAGTTTTTGTACACATCTCAGCAGGAAACAACCTGAGATAGAAGAGTATTTAAAG
921 TGTTGTATGATTACGATATTTCAACGACTGAGAATCTTTATTTTTCAGTAATAATTTCTACTAAGTGTAGATCAAG
922 ATCTATTGGCCTAAGAGTTTAATTTCTACTAAGTGTAGATTAGGGTTTGTTAAGTTTCCCTTTTTACTCGAAAG
923 TG
924
```

925 **Figure S3.** 35S::Nib *N. benthamiana* plants and representative leaves from these plants at 14  
926 dpi inoculated with TEVΔNib::LbCas12a (left) or co-inoculated with TEVΔNib::LbCas12a  
927 and PVX::crFT (right). Chlorotic spots in leaves from co-inoculated plants are indicated with  
928 red arrows.

929

TEVΔNib::LbCas12a

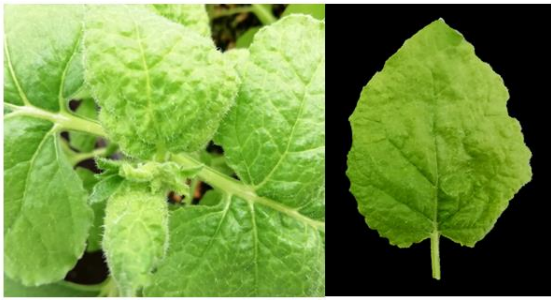

TEVΔNib::LbCas12a + PVX::crFT

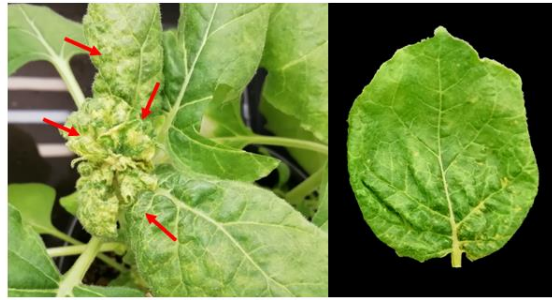

930

931

932

933 **Figure S4.** ICE analysis results of target site mutations in 35S::Nib *N. benthamiana* plants co-  
934 inoculated with TEVΔNib::LbCas12a and PVX::crFT. Examples of sequencing  
935 chromatograms (top) and mutagenesis profiles (bottom) are shown.

936

937

### MU237:

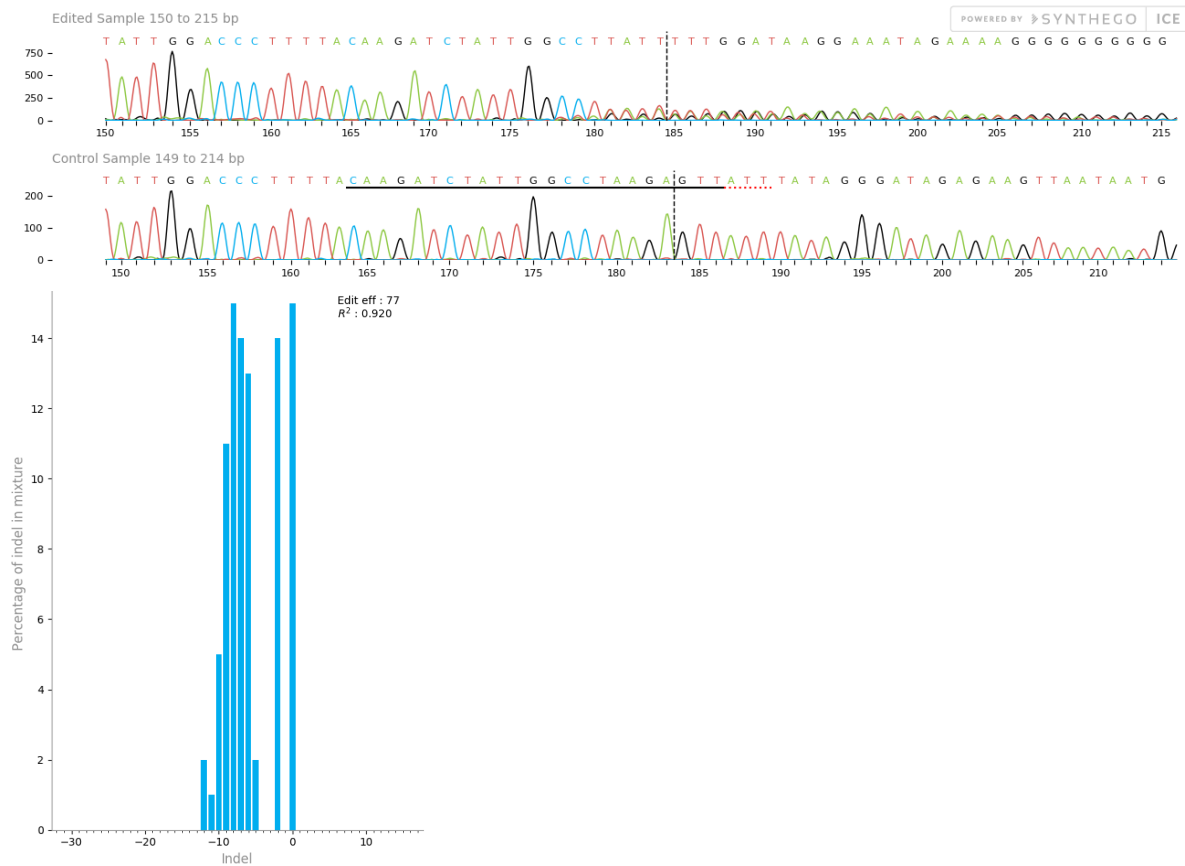

938

939

940

### MU371:

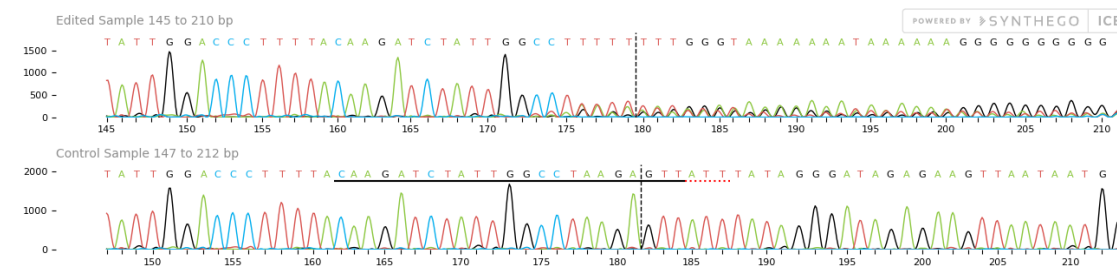

941

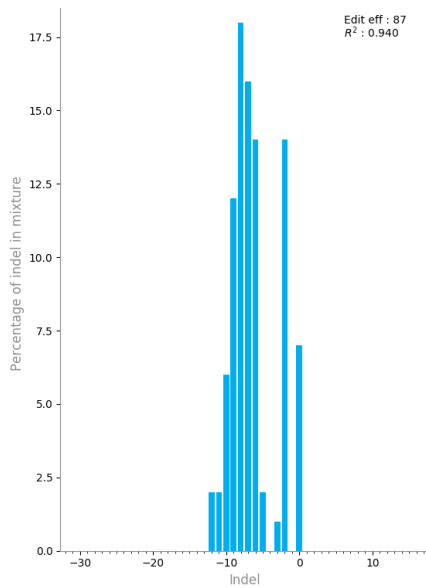

942 **Figure S5.** Representative leaves from wild-type *N. benthamiana* plants at 14 dpi inoculated  
 943 with TEVΔN**Ib**::LbCas12a alone (left), PVX::N**Ib**:crFT alone (middle), or coinoculated with  
 944 TEVΔN**Ib**::LbCas12a and PVX::N**Ib**:crFT (right).  
 945  
 946

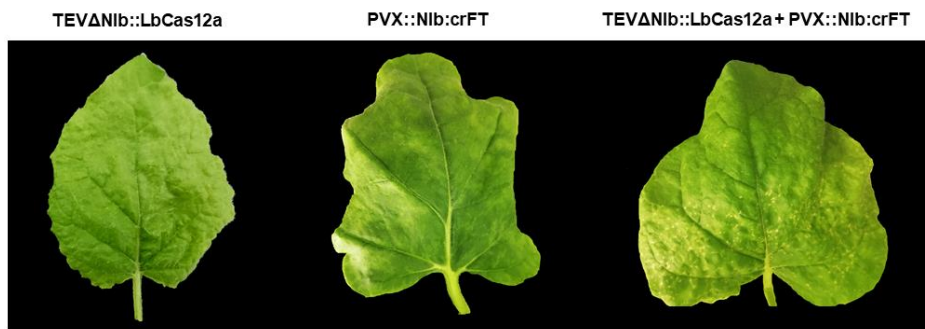

947  
 948  
 949 **Table S1.** *N. benthamiana* genes targeted by the CRISPR-Cas12a system. Note that PAM  
 950 sequence recognised by LbCas12a nuclease is highlighted in grey.

| Target gene  | SolGenomics Accession No | Target site                         |
|--------------|--------------------------|-------------------------------------|
| <i>NbFT</i>  | Niben101Scf01519g10008.1 | <b>TTTA</b> CAAGATCTATTGGCCTAAGAGTT |
| <i>NbXT1</i> | Niben101Scf04205g03008.1 | <b>TTTA</b> TATGTAGGTGTATTTGGAATTCT |

951  
 952 **Table S2.** Primers used for the construction of recombinant viruses.

| Construct element | Primer*   | Primer sequence (5'→3')                                              | Purpose                                                         |
|-------------------|-----------|----------------------------------------------------------------------|-----------------------------------------------------------------|
| LbCas12a          | D2521 (F) | attggtgtactcgcaaggggagaagATG<br>AGCAAGCTGGAGAAG                      | Amplification of <i>LbCas12a</i> for TEVΔN <b>Ib</b> ::LbCas12a |
|                   | D2508 (R) | tctgaaaataaagattctcagtcgtGGCA<br>TAGTCGGGGACATC                      | Amplification of <i>LbCas12a</i> for TEVΔN <b>Ib</b> ::LbCas12a |
| crFT              | D3591 (F) | gagtcagcaccagctagcaTAATTT<br>CTACTAAGTGTAGATCAAG<br>ATCTATTGGCCTAAG  | Amplification of crFT for PVX::crFT                             |
|                   | D3592 (R) | gggaaacttaacaaaccctaATCTACA<br>CTTAGTAGAAATTAAGCTC<br>TTAGGCCAATAGAT | Amplification of crFT for PVX::crFT                             |



|                 |           |                                                                      |                                                               |
|-----------------|-----------|----------------------------------------------------------------------|---------------------------------------------------------------|
|                 | D3712 (F) | tttcagtaaTAATTTCTACTAAG<br>TGTAGATCAAGATCTATTG<br>GCCTAAG            | Amplification of crFT<br>for PVX::Nlb:crFT                    |
|                 | D3713 (R) | gggaaacttaacaaaccctaATCTACA<br>CTTAGTAGAAATTAAGCTC<br>TTAGGCCAATAGAT | Amplification of crFT<br>for PVX::Nlb:crFT                    |
| pBPVX::<br>crFT | D4036 (F) | TAATTTCTACTAAGTGTAG<br>ATCAAGATCTATTGG                               | Amplification of<br>pBPVX::crFT for<br>PVX::crXT1:crTFL1:crFT |
|                 | D3536 (R) | TGCTAGCTGGTGCTGACC                                                   | Amplification of<br>pBPVX::crFT for<br>PVX::crXT1:crTFL1:crFT |
| crXT1           | D4037 (F) | gaggtcagcaccagctagcaTAATTT<br>CTACTAAGTGTAGATTATG<br>TAGGTGTATTGG    | Amplification of crXT1 for<br>PVX::crXT1:crFT                 |
|                 | D4038 (R) | ATCTACACTTAGTAGAAAT<br>TAAGAATTCCAAATACACC                           | Amplification of crTFL1<br>3.1/14.1 for<br>PVX::crXT1:crFT    |
| Nlb             | D3710 (F) | gaggtcagcaccagctagcaTGGGGG<br>AGAAGAGGAAATG                          | Amplification of TEV Nlb<br>cistron for PVX::Nlb:crFT         |
|                 | D3711 (R) | gtagaaattaTACTGAAAATAA<br>AGATTCTCAGTCG                              | Amplification of TEV Nlb<br>cistron for PVX::Nlb:crFT         |

953 \*F, forward primer; R, reverse primer

954

955 **Table S3.** Primer combinations used for the construction of recombinant viruses.

| Construct         | Primer names                                           |
|-------------------|--------------------------------------------------------|
| TEVΔNlb::LbCas12a | D2521 + D2508 (template: pcDNA3.1::hLbCpf1)            |
| PVX::crFT         | D3591+ D3592 (no template)                             |
| PVX::crXT1:crFT   | D4037 + D4038<br>D4036 + D3536 (template: pBPVX::crFT) |
| PVX::Nlb:crFT     | D3710 + D3711 (template: pGTEVa)<br>D3712 + D3713      |

956

957 **Table S4.** Primers used for TEVΔNlb diagnosis by RT-PCR.

| Primer*   | Primer sequence (5'→3')              | Purpose                                                    |
|-----------|--------------------------------------|------------------------------------------------------------|
| D179 (R)  | CTCGCACTACATAGGAGAATTAGAC            | Reverse transcription of<br>TEVΔNlb mRNA into cDNA         |
| D178 (F)  | AGTGGCACTGTGGGTGCTGGTGTTG            | Analysis of<br>TEVΔNlb infection                           |
| D211 (R)  | GGCGCGGCGTCGACCTGGCGGACCCC<br>TAATAG | Analysis of<br>TEVΔNlb infection                           |
| D3604 (F) | ATAAGGAGACAGACTATCGGGC               | Expression of <i>LbCas12a</i><br>nuclease in TEVΔN progeny |
| D3605 (R) | TGATCTGTCCGTGATTGTTCTC               | Expression of <i>LbCas12a</i><br>nuclease in TEVΔN progeny |

958 \*F, forward primer; R, reverse primer, S, sequencing primer

959

960 **Table S5.** Primers used for Cas12a-crRNA gene editing analysis.

| <b>Gene</b>  | <b>Primer name</b> | <b>Primer sequence (5'→3')</b> | <b>Purpose</b>                                                                 |
|--------------|--------------------|--------------------------------|--------------------------------------------------------------------------------|
| <i>NbFT</i>  | D3667 (F)          | CTAGAAAACCTATGGCTATAAGGG       | Amplification of a 550-nt DNA fragment flanking <i>NbFT</i> target region      |
|              | D3668 (R)          | GTTCTCGAGAGGTATAATATAGGC       | Amplification of a 550-nt DNA fragment flanking <i>NbFT</i> target region      |
|              | D3669              | CACAAGCACGCATAGAAC             | Sequencing of the 550-nt PCR product for the analysis of <i>NbFT</i> editing   |
| <i>NbXT1</i> | JO16 JUN05 (F)     | AACCACTTTTCCTCGTCGGAAA         | Amplification of a 1286-nt DNA fragment flanking <i>NbXT1</i> target region    |
|              | JO16 JUN06 (R)     | TAACTATTCAACTAAAGCTTCAAACAG    | Amplification of a 1286-nt DNA fragment flanking <i>NbXT1</i> target region    |
|              | JO16 NOV05         | TGTTTAATGAAGATTGTCTGG          | Sequencing of the 1286-nt PCR product for the analysis of <i>NbXT1</i> editing |

961 \*F, forward primer; R, reverse primer

962

963
